# Supplementary material
Source: ML conference proceedings conference paper supplement (https://openreview.net/forum?id=IyTArtpuCK)
Supplement: supplementary_material [file attachment]

---

# Assumption violations in casual discovery and the robustness of score matching

---

Anonymous Author(s)

Affiliation

Address

email

## Abstract

1 When domain knowledge is limited and experimentation is restricted by ethical,  
2 financial, or time constraints, practitioners turn to observational causal discovery  
3 methods to recover the causal structure, exploiting the statistical properties of their  
4 data. Because causal discovery without further assumptions is an ill-posed problem,  
5 each algorithm comes with its own set of usually untestable assumptions, some  
6 of which are hard to meet in real datasets. Motivated by these considerations, this  
7 paper extensively benchmarks the empirical performance of recent causal discovery  
8 methods on observational *iid* data generated under different background conditions,  
9 allowing for violations of the critical assumptions required by each selected ap-  
10 proach. Our experimental findings show that score matching-based methods demon-  
11 strate surprising performance in the false positive and false negative rate of the  
12 inferred graph in these challenging scenarios, and we provide theoretical insights  
13 into their performance. This work is also the first effort to benchmark the stability of  
14 causal discovery algorithms with respect to the values of their hyperparameters. Fi-  
15 nally, we hope this paper will set a new standard for the evaluation of causal discov-  
16 ery methods and can serve as an accessible entry point for practitioners interested  
17 in the field, highlighting the empirical implications of different algorithm choices.

## 18 1 Introduction

19 The ability to infer causal relationships from observational data, instead of simple statistical asso-  
20 ciations, is crucial to answer interventional and counterfactual queries without direct manipulation  
21 of a system [1, 2, 3, 4]. The challenge of drawing causal conclusions from pure observations lies  
22 in the modeling assumptions on the data, which are often impossible to verify. Methods based on  
23 conditional independence testing (e.g. PC, FCI and their variations [4, 5, 6]) require *faithfulness* of  
24 the distribution [1, 2, 4, 7] to the causal graph, which formalizes the intuition that causal relations  
25 manifest themselves in the form of statistical dependencies among the variables. The assumption  
26 of *causal sufficiency* (i.e. the absence of unobserved confounders [8]) is a common requirement for  
27 causal discovery [4, 6, 9, 10, 11, 12], which allows interpreting associations in the data as causal  
28 relationships. These strong conditions are arguably necessary but nevertheless hard or impossible to  
29 verify, and posit an entry barrier to the unobscured application of causal analysis in general settings.  
30 In addition to that, structure identifiability results define limitations on the parts of the causal graph  
31 that can be inferred from pure observations [1, 10, 13]. Traditional causal discovery methods (e.g.  
32 PC, FCI, GES [4, 9]) are limited to the inference of the Markov Equivalence Class of the ground truth  
33 graph [14], while additional assumptions on the structural equations generating effects from the cause  
34 ensure identifiability of a unique Directed Acyclic Graph (DAG) from observational data. In partic-  
35 ular, restrictions on the class of functions generating the data (linear or not) and on the distribution  
36 of the noise terms (i.e. additive noise models assumed in LINGAM and more) characterizing their  
37 non-deterministic relationships are necessary in order to infer causal directions [10, 11, 12, 13]. Re-

quirements on the data collection process are also needed: although an error-free measurement model is commonly assumed, it has been a recent subject of interest that measurement error in the observed values of the variables can greatly change the output of various causal discovery methods [15, 16].

Real data hardly satisfy all of these assumptions at once, and it is often the case that these are impossible to verify, which calls for algorithms that demonstrate a certain degree of robustness with respect to violations of the model hypothesis. Previous work from Heinze-Deml et al. [17] investigates the boundaries of robust graph inference under model misspecifications, on Structural Causal Models (SCM) with linear functional mechanisms. Mooij et al. [18] benchmark considers the case of additive noise models with nonlinear mechanisms, but only for datasets with two variables. Singh et al. [19] presents an empirical evaluation limited to methods whose output is a Markov Equivalence Class. Glymour et al. [14] review some of the existing approaches with particular attention to their required assumptions, but without experimental support to their analysis. Our paper presents an extensive empirical study that evaluates the performance of classical and recent causal discovery methods on observational datasets generated from *iid* distributions under diverse background conditions. Notably, the effects of these conditions on most of the methods included in our benchmark have not been previously investigated. We compare causal discovery algorithms from the constraint and score-based literature, as well as methods based on restricted functional causal models of the family of additive nonlinear models [11, 13, 20]. These include a recent class of methods deriving connections between the score matching [21, 22] with the structure of the causal graph [23, 24, 25]. Algorithms that focus on *sequential* data [26, 27, 28, 29, 30, 31, 32, 33, 34, 35, 36, 37] are beyond the scope of this paper’s benchmarking. Finally, we propose an experimental analysis of the stability of the benchmarked approaches with respect to the choices of their hyperparameters, which is the first effort of this type in the literature.

We summarise the contributions of our paper as follows:

- We investigate the performance of current causal discovery methods in a large scale experimental study on datasets generated under different background conditions with violations of the required background assumptions. Our experimental protocol consists of more than 2M experiments with 11 different causal discovery methods on more than 60000 datasets synthetically generated.
- We release the code for the generation of the synthetic data and a Python implementation of six causal discovery algorithms with a shared API. With this contribution, we aim at facilitating the benchmarking of future work in causal discovery on challenging scenarios, and the comparison with the most prominent existing baselines.
- We analyze our experimental results, and present theoretical insights on why score matching-based approaches show better robustness in the setting where assumptions on the data may be violated, compared to the other methods. Based on our empirical evidence, we suggest a new research direction focused on understanding the role of the statistical estimation algorithms applied for causal inference, and the connection of their inductive biases with good empirical performance.

## 2 The causal model

In this section, we define the problem of causal discovery, with a brief introduction to the formalism of Structural Causal Models (SCMs). Then we provide an overview of SCMs for which sufficient conditions for the *identifiability* of the causal graph from observational data are known.

### 2.1 Problem definition

A Structural Causal Model  $\mathcal{M}$  is defined by the set of *endogenous* variables  $\mathbf{X} \in \mathbb{R}^d$ , vertices of the causal graph  $\mathcal{G}$  that we want to identify, the *exogenous* noise terms  $\mathbf{U} \in \mathbb{R}^d$  distributed according to  $p_{\mathbf{U}}$ , as well as the functional mechanisms  $\mathcal{F} = (f_1, \dots, f_d)$ , assigning the value of the variables  $X_1, \dots, X_d$  as a deterministic function of their causes and of some random disturbance.

Each variable  $X_i$  is defined by a structural equation:

$$X_i := f_i(\text{PA}_i, U_i), \quad \forall i = 1, \dots, d, \quad (1)$$

where  $\text{PA}_i \subset \mathbf{X}$  is the set of parents of  $X_i$  in the causal graph  $\mathcal{G}$ , and denotes the set of direct causes of  $X_i$ . Under this model, the recursive application of Equation (1) entails a joint distribution  $p_{\mathbf{X}}$ , such that the Markov factorization holds:

$$p_{\mathbf{X}}(\mathbf{X}) = \prod_{i=1}^d p_i(X_i | \text{PA}_i), \quad (2)$$

87 The goal of causal discovery is to infer the causal graph underlying  $\mathbf{X}$  from a set of  $n$  observations  
 88 sampled from  $p_{\mathbf{X}}$ .

## 89 2.2 Identifiable models

90 In order to identify the causal graph of  $\mathbf{X} \in \mathbb{R}^d$  from purely observational data, further assumptions  
 91 on the functional mechanisms in  $\mathcal{F}$  and on the joint distribution  $p_{\mathbf{U}}$  of model (1) are needed.  
 92 Intuitively, having one condition between nonlinearity of the causal mechanisms and non-Gaussianity  
 93 of the noise terms is necessary to ensure the identifiability of the causal structure. Additionally, we  
 94 consider causal *sufficiency* (Appendix A.3) of the model to be satisfied, unless differently specified.

95 **Linear Non-Gaussian Model (LINGAM).** A linear SCM is defined by the system of structural  
 96 equations

$$\mathbf{X} = \mathbf{B}\mathbf{X} + \mathbf{U}. \quad (3)$$

97  $\mathbf{B} \in \mathbb{R}^{d \times d}$  is the matrix of the coefficients that define  $X_i$  as a linear combination of its parents and  
 98 the disturbance  $U_i$ . Under the assumption of non-Gaussian distribution of the noise terms, the model  
 99 is identifiable. This SCM is known as the LiNGAM (Linear Non-Gaussian Acyclic Model) [12].

100 **Additive Noise Model.** An Additive Noise Model (ANM) [11, 13] is defined by Equation (1) when  
 101 it represents the causal effects with nonlinear functional mechanisms and additive noise terms:

$$X_i := f_i(\text{PA}_i) + U_i, \forall i = 1, \dots, d, \quad (4)$$

102 with  $f_i$  nonlinear. Additional conditions on the class  $\mathcal{F}$  of functional mechanisms and on the joint  
 103 distribution of the noise terms are needed to ensure identifiability [13]. In the remainder of the paper,  
 104 we assume these to hold when referring to ANMs.

105 **Post NonLinear Model.** The most general model for which sufficient conditions for the identifiability  
 106 of the graph are known is the Post NonLinear model (PNL) [10]. In this setting the structural equation  
 107 (1) can be written as:

$$X_i := g_i(f_i(\text{PA}_i) + U_i), \forall i = 1, \dots, d, \quad (5)$$

108 where both  $g_i$  and  $f_i$  are nonlinear functions and  $g_i$  is invertible. As for ANMs, we consider  
 109 identifiability conditions defined in Zhang and Hyvärinen [10] to be satisfied in the rest of the paper.

## 110 3 Experimental design

111 In this section, we describe the experimental design choices regarding the generation of the synthetic  
 112 datasets, the evaluated methods, and the selected metrics.

### 113 3.1 Datasets

114 The challenge of causal structure learning lies in the modeling assumptions of the data, which are  
 115 often untestable. Our aim is to investigate the performance of existing causal discovery methods in  
 116 the setting where these assumptions are violated. To this end, we generate synthetic datasets under  
 117 diverse background conditions, defined by modeling assumptions that do not match the working  
 118 hypothesis of the evaluated methods.

119 **Vanilla model.** First, we specify an additive noise model with variables generated according to the  
 120 structural equation (4). The exogenous terms follow a Gaussian distribution  $U_i \sim \mathcal{N}(0, \sigma_i)$  with  
 121 variance  $\sigma_i \sim U(0.5, 1.0)$  uniformly sampled. We generate the nonlinear mechanisms  $f_i$  by sampling  
 122 Gaussian processes with a unit bandwidth RBF kernel (Appendix B.1). We refer to this model as  
 123 the *vanilla* scenario, as it is at one time both identifiable and compliant with the assumptions of the  
 124 majority of the benchmarked methods (see Table 1).

#### 125 3.1.1 Misspecified scenarios

126 We define additional scenarios such that each specified model targets a specific assumption violation  
 127 with respect to the vanilla conditions.

128 **Confounded model.** Let  $\mathbf{Z} \in \mathbb{R}^d$  be a set of latent common causes. For each pair of distinct nodes  
 129  $X_i$  and  $X_j$ , we sample a Bernoulli random variable  $C_{ij} \sim \text{Bernoulli}(\rho)$  such that  $C_{ij} = 1$  implies  
 130 a confounding effect between  $X_i$  and  $X_j$ . The index  $k$  of the confounder  $Z_k$  is assigned at random.  
 131 The parameter  $\rho \in \{0.1, 0.2\}$  determines the amount of confounded pairs in the graph.

|                         | PC    | FCI | GES   | DirectLiNGAM | RESIT | CAM | SCORE | DAS | NoGAM | DiffAN | GraN-DAG |
|-------------------------|-------|-----|-------|--------------|-------|-----|-------|-----|-------|--------|----------|
| Gaussian noise          | ✓     | ✓   | ✓     | ✗            | ✓     | ✓   | ✓     | ✓   | ✓     | ✓      | ✓        |
| Non-Gaussian noise*     | ✓     | ✓   | ✗     | ✓            | ✓     | ✗   | ✗     | ✗   | ✓     | ✗      | ✗        |
| Linear mechanisms       | ✓     | ✓   | ✓     | ✓            | ✗     | ✗   | ✗     | ✗   | ✗     | ✗      | ✗        |
| Nonlinear mechanisms    | ✓     | ✓   | ✓     | ✗            | ✓     | ✓   | ✓     | ✓   | ✓     | ✓      | ✓        |
| Unfaithful distribution | ✗     | ✗   | ✗     | ✓            | ✓     | ✓   | ✓     | ✓   | ✓     | ✓      | ✓        |
| Confounding effects     | ✗     | ✓   | ✗     | ✗            | ✗     | ✗   | ✗     | ✗   | ✗     | ✗      | ✗        |
| Measure errors          | ✗     | ✗   | ✗     | ✗            | ✗     | ✗   | ✗     | ✗   | ✗     | ✗      | ✗        |
| Output                  | CPDAG | PAG | CPDAG | DAG          | DAG   | DAG | DAG   | DAG | DAG   | DAG    | DAG      |

\* GraN-DAG and GES optimize the Gaussian likelihood.

Table 1: Summary of the methods assumptions and their output graph. The content of the cells denotes whether the method supports (✓) or not (✗) the condition specified in the corresponding row.

132 **Measurement error model.** Measurement errors in the process that generates the data are regarded  
133 as a source of mistakes for the inference of the causal graph [15, 16]. In order to account for potential  
134 errors induced by the measurements, we specify a model in which the observed variables are:

$$\tilde{X}_i := X_i + \epsilon_i, \forall i = 1, \dots, d, \quad (6)$$

135 a noisy version of the  $X_i$ 's generated by the ANM of Equation (4). The  $\epsilon_i$  disturbances are indepen-  
136 dent Gaussian random variables centered at zero, whose variance is parametrized by the inverse signal  
137 to noise ratio  $\gamma_i := \frac{\text{Var}(\epsilon_i)}{\text{Var}(X_i)}$ . Given that the total variance of  $\tilde{X}_i$  is  $\text{Var}(\tilde{X}_i) = \text{Var}(X_i) + \text{Var}(\epsilon_i)$ ,  $\gamma_i$   
138 controls the amount of variance in the observations that is explained by the error in the measurement.  
139 Each dataset with measurement error is parametrized with  $\gamma \in \{0.2, 0.4, 0.6, 0.8\}$ , shared by all the  $\epsilon_i$ .

140 **Unfaithful model.** To model violations of the *faithfulness* assumption (Appendix A.2), we tune  
141 the causal mechanisms of Equation (4) such that we induce direct cancellation of causal effects  
142 between some variables. In particular, for each triplet  $X_i \rightarrow X_k \leftarrow X_j \leftarrow X_i$  in the graph,  
143 causal mechanisms are adjusted such that cancellation of the causal effect  $X_i \rightarrow X_k$  occurs (for  
144 implementation details, see Appendix B.4). This is a partial model of unfaithfulness, as it only  
145 covers a limited subset of the scenarios under which unfaithful path canceling might occur, and  
146 must be viewed in the light that there is no established procedure to enforce unfaithful conditional  
147 independencies in the case of ANM with nonlinear relationships.

148 **Autoregressive model.** In order to simulate violations of the *iid* distribution of the data, we model  
149 observations as a stochastic process where each sample is indexed by time. In particular, we define  
150 the structural equations generating the data as:

$$X_i(t) := \alpha X_i(t-1) + f_i(\text{PA}_i(t)) + U_i, \quad t = 1, 2, 3, \dots \quad \alpha \in \mathbb{R}. \quad (7)$$

151 Autoregressive effects are modeled with a time lag  $l = 1$ , whereas at  $t = 0$  we define  $X_i(0)$  with  
152 Equation (4). The ground truth is the graph whose edges represent the connections between parents  
153  $\text{PA}_i(0)$  and their direct effect  $X_i(0)$ .

154 **Post NonLinear model.** We replace nonlinear causal mechanisms of the additive noise models (4)  
155 with the structural equations defined in the PNL model (5). We select the post nonlinear function  $g_i$   
156 such that  $g_i(x) = x^3, x \in \mathbb{R}, \forall i = 1, \dots, d$ .

157 **LiNGAM model.** We define a model with the linear system of structural equations (3). The  
158 non-Gaussian distribution of the noise terms is defined as a nonlinear transformation of a standard  
159 normal random variable (see Appendix B.2), and the linear mechanisms are simulated by sampling  
160 the weighting coefficients of the parents of a node in the interval  $[-1, -0.05] \cup [0.05, 1]$ .

### 161 3.1.2 Data generation

162 For each specified model, we generate datasets that differ under the following characteristics: num-  
163 ber of nodes  $d \in \{5, 10, 20, 50\}$ , number of samples  $n \in \{100, 1000\}$  and density of edges  $p \in$   
164  $\{\text{sparse}, \text{dense}\}$ . We sample the ground truth causal structures according to different algorithms for

random graph generation. In line with previous causal discovery literature [23, 24, 25, 38, 39] we generate Erdos-Renyi (ER) [40] and Scale-free (SF) graphs [41]. Furthermore, we consider Gaussian Random Partitions (GRP) [42] and Fully Connected graphs (FC) (see Appendix B.3). By considering all the combinations of the number of nodes, number of samples, admitted edge densities, and algorithms for structure generation, we define a cartesian product with all the graphs configurations of interest. For each of such configurations and for each modeling scenario, we generate a dataset  $\mathcal{D}$  and its ground truth  $\mathcal{G}$  with 20 different random seeds. Details on the generated data can be found in Appendix B.5.

## 3.2 Methods

We consider 11 different algorithms and a random baseline spanning across the main families of causal discovery approaches: constraint and score-based methods, and methods defined under restrictions on the structural causal equations. In the main text, we provide a detailed overview of the methods most relevant for the discussion of our key experimental findings. The remaining approaches are described in further detail in the Appendix C. Table 1 summarizes the algorithms' assumptions and the output object of their inference procedure.

**Method outputs.** Causal discovery algorithms output different graphical objects based on their underlying assumptions. If identifiability is not implied by the model requirements but *faithfulness* of the distribution is satisfied, one can instead recover the Markov equivalence class of the ground truth graph, that is, the set of DAGs sharing the same conditional independencies. This is represented by a complete partially directed acyclic graph (CPDAG), where undirected edges  $X_i - X_j$  are meant to encode conditional dependence between the variables, but uncertainty in the edge orientation. If a method can identify a directed acyclic graph  $\mathcal{G} = (\mathbf{X}, \mathcal{E})$ , one can define a partial ordering of the nodes  $\pi = \{X_{\pi_1}, \dots, X_{\pi_d}\}$ ,  $\pi_i \in \{1, \dots, d\}$ , such that whenever we have  $X_{\pi_i} \rightarrow X_{\pi_j} \in \mathcal{E}$ , then  $X_{\pi_i} \prec X_{\pi_j}$  ( $X_{\pi_j}$  is a *successor* of  $X_{\pi_i}$  in the ordering) [43]. The permutation  $\pi$  is known as the *topological order* of  $\mathcal{G}$ , and allows to disambiguate the direction of the edges in the graph. A topological order can be encoded in a fully connected DAG with edges  $\mathcal{E}_\pi = \{X_{\pi_i} \rightarrow X_{\pi_j} : X_{\pi_i} \prec X_{\pi_j}, \forall i, j = 1, \dots, d\}$ , obtained connecting all nodes in the ordering  $\pi$  with their successors.

**Methods summary.** A summary of all the methods included in the benchmark and their required assumptions is presented in Table 1. PC [4] and GES [9] are limited to identifying the Markov equivalence class of the DAG. DirectLiNGAM [44] is designed for inference on data generated by a linear non-Gaussian model whereas SCORE [23], NoGAM [25], DiffAN [45], DAS [24], RESIT [13], GraN-DAG [38] and CAM [46], are meant for inference on additive noise models: these methods perform inference in a two steps procedure, first identifying a topological ordering of the graph, and then selecting edges between those admitted by the inferred causal order. To enable fair comparison in our experiments, all methods (with the exception of DirectLiNGAM) are implemented with the same algorithm for edge detection, consisting of variable selection with sparse regression. This pruning strategy is known as *CAM-pruning*, being originally proposed in CAM paper [46]. A detailed discussion of all the methods in the benchmark is presented in Appendix C. In the Appendix L we consider experiments on FCI [4], which are not reported in the main text since we did not find metrics for a straightforward comparison of its output partial ancestral graph (PAG [47]) with CPDAGs and DAGs.

**Selected metrics** To evaluate the output graphs we use the false positive and false negative rates, and the F1 score (details in the Appendix D). In the case of directed edges inferred with reversed direction, we count this error as a false negative. For methods that output a CPDAG with undirected edges, we evaluate them favorably by assuming correct orientation whenever possible, similar to Zheng et al. [39, 48]. For the methods whose output also includes an estimate  $\hat{\pi}$  of the topological order, we define the false negative rate of the fully connected DAG with edges  $\mathcal{E}_{\hat{\pi}} = \{X_{\hat{\pi}_i} \rightarrow X_{\hat{\pi}_j} : X_{\hat{\pi}_i} \prec X_{\hat{\pi}_j}, \forall i, j = 1, \dots, d\}$ , denoted as  $\text{FNR}-\hat{\pi}$ . If  $\hat{\pi}$  is correct with respect to the ground truth graph, then  $\text{FNR}-\hat{\pi} = 0$ .

This choice of metrics reflects the implementation of most of the algorithms involved in the benchmark, which separates the topological ordering step from the actual edge selection. In particular, given that the majority of the methods share the same pruning procedure after the inference of the order, we expect that differences in the performance will be mostly observed in the  $\text{FNR}-\hat{\pi}$  score.

### 3.2.1 Deepdive on SCORE, NoGAM and DiffAN

In this section, we review a recent class of causal discovery algorithms, that derive constraints on the score function  $\nabla \log p(\mathbf{X})$  that uniquely identify the directed causal graph of an additive noise model. Identifiability assumptions provide sufficient conditions to map a joint distribution  $p_{\mathbf{X}}$  to the unique causal DAG  $\mathcal{G}$  induced by the underlying SCM. Applying the logarithm to the Markov factorization of

the distribution of Equation (2), we observe that  $\log p_{\mathbf{X}}(\mathbf{X}) = \sum_i^d \log p(X_i | \text{PA}_i)$ . By inspection of the gradient vector  $\nabla \log p_{\mathbf{X}}(\mathbf{X})$ , it is possible to derive constraints mapping the score function to the causal graph of an ANM. Given a node  $X_i$  in the graph, its corresponding score entry is defined as:

$$s_i(\mathbf{X}) := \partial_{X_i} \log p_{\mathbf{X}}(\mathbf{X}) = \partial_{X_i} \log p_i(X_i | \text{PA}_i) + \sum_{k \in \text{CH}_i} \partial_{X_i} \log p_k(X_k | \text{PA}_k). \quad (8)$$

Instead, the rate of change of the log-likelihood over a leaf node  $X_l$  with set of children  $\text{CH}_l = \emptyset$  is:

$$s_l(\mathbf{X}) := \partial_{X_l} \log p_{\mathbf{X}}(\mathbf{X}) = \partial_{X_l} \log p_l(X_l | \text{PA}_l). \quad (9)$$

We see that, for a leaf node, the summation over the set of children of Equation (8) vanishes. Intuitively, being able to capture this asymmetry in the score entries enables the identification of the topological order of the causal graph.

**SCORE.** The SCORE algorithm [23] identifies the topological order of ANMs with Gaussian noise terms by iteratively finding leaf nodes as the  $\text{argmin}_i \text{Var}[\partial_{X_i} s_i(\mathbf{X})]$ , given that the following holds:

$$\text{Var}[\partial_{X_i} s_i(\mathbf{X})] = 0 \iff X_i \text{ is a leaf, } \forall i = 1, \dots, d. \quad (10)$$

**NoGAM.** The NoGAM [24] algorithm generalizes the ideas of SCORE on additive noise models with an arbitrary distribution of the noise terms. After some manipulations, it can be shown that for a leaf node  $X_l$  the score entry of Equation (9) satisfies

$$s_l(\mathbf{X}) = \partial_{U_l} \log p_l(U_l), \quad (11)$$

such that one could learn a consistent estimator of  $s_l$  taking as input the exogenous variable  $U_l$ . For an ANM, the authors of NoGAM show that the noise term of a leaf is equivalent to the residual defined as:

$$R_i := X_i - \mathbf{E}[X_i | \mathbf{X} \setminus \{X_i\}], \forall i = 1, \dots, d. \quad (12)$$

Then, by replacing  $U_l$  with  $R_l$  in Equation (11), it is possible to find a consistent approximator of the score of a leaf using  $R_l$  as the predictor. Formally:

$$\mathbf{E}[(\mathbf{E}[s_i(\mathbf{X}) | R_i] - s_i(\mathbf{X}))^2] = 0 \iff X_i \text{ is a leaf,} \quad (13)$$

which identifies a leaf node as the  $\text{argmin}$  of the vector of the mean squared errors of the regression of the score entries  $s_i(\mathbf{X})$  on the corresponding residuals  $R_i$ , for all  $i = 1, \dots, d$ .

**Connection of NoGAM with the post nonlinear model.** It is interesting to notice that, similarly to Equation (11) for additive noise models, the score of a leaf  $X_l$  generated by a PNL model can be defined as a function of the disturbance  $U_l$ .

**Proposition 1.** *Let  $\mathbf{X} \in \mathbb{R}^d$  be generated according to the post nonlinear model (5). Then, the score function of a leaf node  $X_l$  satisfies  $s_l(\mathbf{X}) = \partial_l \log p_l(g(U_l))$ .*

This result suggests a connection with the NoGAM sorting criterion: indeed, one could hope to identify leaf nodes in the graph by consistent estimation of the score of a leaf from residuals equivalent to the noise terms. A more detailed discussion with the proof of Proposition 1 is presented in Appendix E.

**DiffAN.** DiffAN [45] method finds the topological ordering of a DAG exploiting the same criterion of Equation (10) of SCORE: the difference is in that it estimates the score function with probabilistic diffusion models, whereas SCORE, NoGAM, and DAS [24] rely on score matching estimation [21, 22].

## 4 Key experimental results and analysis

In this section we present our experimental findings on datasets generated according to the misspecified models of Section 3.1.1, with theoretical insights into the performance of score matching-based approaches. We draw our conclusions by comparing the methods' performance against their accuracy in the vanilla scenario and against a random baseline<sup>1</sup> (defined in Appendix C.10). The results are discussed on datasets of size 1000 for Erdos-Renyi dense graphs with 20 nodes (*ER-20 dense*), and can be generalized to different size and sparsity configurations. Due to space

<sup>1</sup>We use the <https://github.com/cdt15/lingam> implementations of RESIT and DirectLiNGAM, and the DoDiscover implementations of PC, GES, and FCI. For the remaining methods, we consider the GitHub official repositories of their papers and custom implementations.

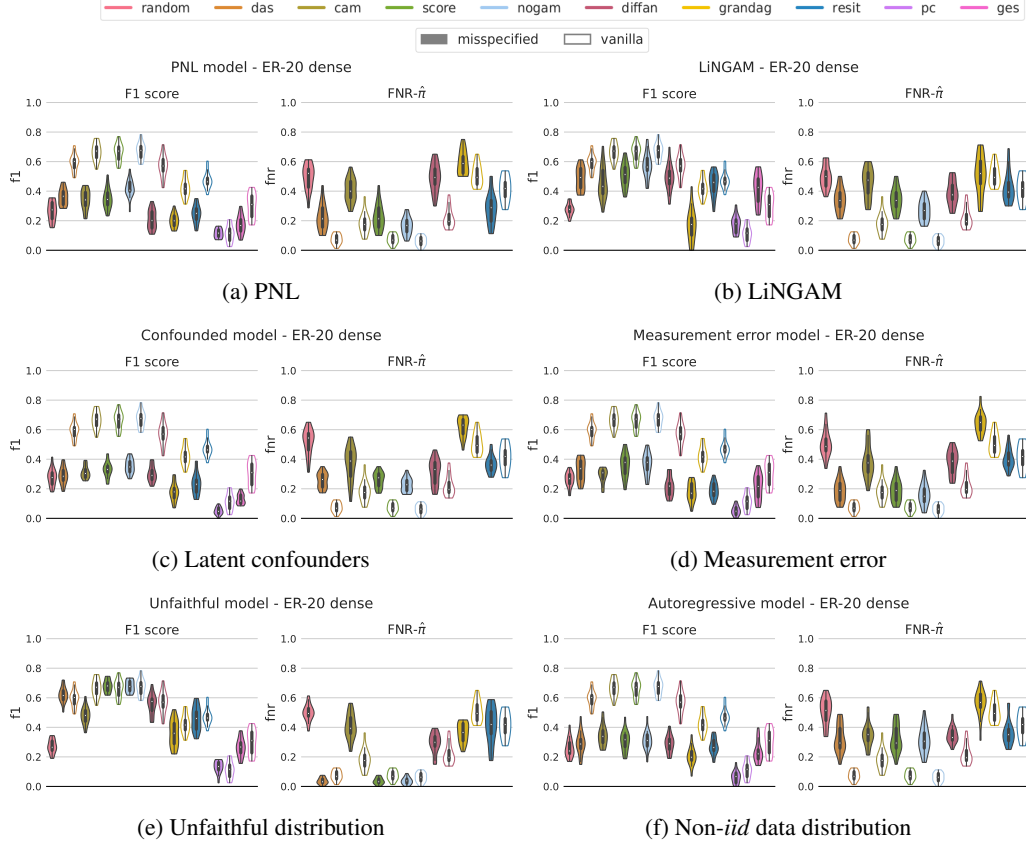

Figure 1: Experimental results on the misspecified scenarios. For each method, we also display the violin plot of its performance on the *vanilla* scenario with transparent color. F1 score (the higher the better) and FNR- $\hat{\pi}$  (the lower the better) are evaluated over 20 seeds on Erdos-Renyi dense graphs with 20 nodes (ER-20 dense). FNR- $\hat{\pi}$  is not computed for GES and PC, methods whose output is a CPDAG. Note that DirectLiNGAM performance is reported in Appendix I.2, on data under non-Gaussian distribution of the noise terms.

constraints, we include the plots only for the F1 score and FNR- $\hat{\pi}$ , whereas the false negative and false positive rates are discussed in Appendix I. In order to provide statistical significance to our conclusions, we repeat the experiments on each scenario over 20 datasets generated with different random seeds. To enable a fair comparison between the methods, we fix their hyperparameters to their optimal value with respect to each specific dataset, in the case where these can not be tuned without having access to the ground truth (see Appendix G for a discussion on the tuning of GraNDAG and DiffAN learning hyperparameters). In the Appendix H we analyze the stability of the benchmarked methods with respect to different values of their hyperparameters.

#### 4.1 Can current methods infer causality when assumptions on the data are violated?

Our experimental findings suggest that score matching-based algorithms can robustly infer part of the causal information even in the case of misspecified ground truth data generation.

**Post nonlinear model.** Figure 1a (right) illustrates the accuracy of topological order estimates on post nonlinear model data. Among the selected methods, NoGAM shows better ability to generalize its performance to this scenario, with FNR- $\hat{\pi}$  error rate significantly lower than the random baseline. Interestingly, we can interpret this observation in the light of Proposition 1, which defines the score of a leaf in the PNL model: our result indeed suggests that, similarly to the case of an additive noise model, it is possible to learn a consistent approximator of the score of a leaf  $X_l$  from the exogenous variable  $U_l$  of a post nonlinear model. Notably, we also observe that RESIT order accuracy is better in the PNL scenario than in the vanilla case: Zhang and Hyvärinen [10] show that testing for independent residuals identifies the direction of causal relationships also under the PNL model.

**LiNGAM model.** Figure 1b (right) shows that NoGAM can infer the causal order with remarkable accuracy in the case of ground truth data generated by a linear non-gaussian additive model. Together with our observations on the post nonlinear model, our empirical evidence corroborate the idea that the NoGAM algorithm is surprisingly robust with respect to the misspecification of the causal mechanisms. Notably, none of the other methods can infer the ordering with accuracy significantly better than the random baseline. This could lead to decreased performance in the realistic setting of mixed linear and nonlinear mechanisms. However, F1 score in Figure 1b (left) shows that CAM-pruning is still able to correctly infer edges in the graph when these are admitted by the identified causal order. We note that, given that we observed high *varsortability*<sup>2</sup>[49] for this model, we display results on data standardized by removing their empirical variance.

**Confounded model.** Spurious correlations, that occur when the causal sufficiency is violated, can not be handled by statistical tests for edge selection, as shown by the F1 score of Figure 1c (left) (the amount of confounders is parametrized by  $\rho = 0.2$ ). In this case, we are also interested to see whether the presence of latent confounders can disrupt the inference of the topological ordering when the observed variables have a non-spurious connection in the causal graph. Figure 1c (right) indicates that the score matching-based approaches SCORE, DAS, and NoGAM can still be exploited to find a reliable ordering, while other methods fail to do so.

**Measurement error.** Given data generated under the model of Equation (6), we observe convergence in distribution  $p(\tilde{X}_i | PA_i) \xrightarrow{d} p(X_i | PA_i)$  for  $\gamma \rightarrow 0$ . We are then interested in the boundaries of robust performance of each method with respect to increasing values of  $\gamma$ . Figure 1d (right) illustrates FNR- $\hat{\pi}$  on datasets with  $\gamma = 0.8$  such that  $\sim 35\%$  of the observed variance of each variable is due to noise in the measurements. Under these conditions, we see that score matching-based approaches display robustness in the inference of the order where all the other methods capability is comparable to that of the random baseline with statistical significance. This is also reflected in Figure 1d (left), where SCORE, DAS, and NoGAM are the only algorithms whose F1 score (slightly) improves compared to the random baseline.

**Unfaithful model.** Figure 1e (right) shows that the ordering procedure of several methods, in particular SCORE, DAS, NoGAM, and GraN-DAG, seems unaffected by direct cancellation of causal effects, in fact displaying a surprising decrease in the FNR- $\hat{\pi}$  performance with respect to the vanilla scenario. To understand these results, we note that under the occurrence of causal effect cancellations in the ground truth graph  $\mathcal{G}$ , the unfaithful model defined in Section 3.1.1 generates observations of  $\mathbf{X}$  according to a graph  $\tilde{\mathcal{G}}$  whose causal order agrees with that of the ground truth: it is indeed immediate to see that the causal order of  $X_i \rightarrow X_k \leftarrow X_j \leftarrow X_i$  also holds for the triplet  $X_i \rightarrow X_j \rightarrow X_k$ . Moreover, the set of edges of the graph  $\tilde{\mathcal{G}}$  is sparser than that of the ground truth, due to the cancellation of causal effects. Thus, given that inference on sparser graphs is generally easier, it can positively affect the empirical performance, in line with our observations.

**Implications.** Our experimental findings show that most of the benchmarked methods significantly decrease their performance on the misspecified models. This is particularly problematic since the violations considered in this work are realistic and met on many real-world data. On the other hand, we observe surprising robustness in the inference of score matching-based methods.

#### 4.1.1 Discussion on score matching robustness

Our empirical findings indicate that score matching-based methods are surprisingly capable of partial recovery of the graph structure in several of the misspecified scenarios. We connect this robust performance to the decomposition properties of the score function defined in Equations (8) and (9). In particular, we argue that the common factor that enables leaf node identification in NoGAM and SCORE is that the score entry of a leaf is characterized by a smaller magnitude, compared to the score associated with a node that has children in the graph. To explain what we mean by this, we define a simple condition under which it is possible to identify leaf nodes and the causal order of the graph from the variance of the entries of the score function.

**Definition 1.** Let  $\mathbf{X} \in \mathbb{R}^d$  be a random vector defined by a structural causal model  $\mathcal{M}$  (1). Let  $X_l$  be a leaf node of the causal graph  $\mathcal{G}$ . We say that  $X_l$  is *score-identifiable* if  $l = \operatorname{argmin}_i \operatorname{Var}[s_i(\mathbf{X})]$ .

<sup>2</sup>*Varsortability* of a dataset denotes partial agreement between the ordering induced by the values of marginal variance of the observed variables and the causal ordering of the underlying graphical model.



Moreover, we say that the model is *score-sortable* if the recursive identification of *score-identifiable* leaf nodes in the causal graph and in the subgraphs defined by removing a leaf from the set of vertices up to a source node, yields a correct causal order. SCORE, NoGAM, and DAS present results for consistent inference of the structure of an identifiable graph from properties of the score function and its second order partial derivatives. However, when these conditions are not satisfied, exploitation of *score-sortability* can heuristically estimate a causal ordering that partially agrees with the causal structure. Intuitively, the variance of the score of a non-leaf node  $s_i(\mathbf{X})$  of Equation (8) is proportional to the number of children in the summation. In particular, the total variance of  $s_i(\mathbf{X})$  is the sum of the marginal variances of the two terms on the RHS of Equation (8), plus their covariance. Errors in the ordering defined with *score-sortability* are induced only if the variance associated with the score of a non-leaf node can be smaller than the one relative to every leaf of the graph.

**Proposition 2.** *Let  $\mathbf{X} \in \mathbb{R}^d$  be a random vector whose elements  $X_i$  are defined by a structural equation model  $\mathcal{M}$  (1) that satisfies score-sortability. Then, for each subgraph of  $\mathcal{G}$  defined by recursively removing a leaf from the set of vertices up to a source node, there exists a leaf  $X_l$  such that  $\forall i$  index of a node:*

$$\text{Var}[\partial_l \log p_l(X_l | \text{PA}_l)] \leq \text{Var}[\partial_i \log p_i(X_i | \text{PA}_i)] + \sum_{k \in \text{CH}_i} \text{Var}[\partial_k \log p_k(X_k | \text{PA}_k)] + C,$$

with  $C \in \mathbb{R}$  accounting for the covariance term.

(See Appendix F for the proof.) Lemma 1 of SCORE defines a similar criterion of sortability of the causal variables on the variance of the second order partial derivatives of the log-likelihood, which is always satisfied when  $\mathbf{X} \in \mathbb{R}^d$  is generated by an ANM with Gaussian distribution of the noise terms. We can extend these considerations to the NoGAM algorithm, which identifies leaf nodes by minimizing the mean squared error of the predictions of the score entries from the residual estimators of the noise terms, as defined in Equation (13). If we consider an uninformative predictor of the score function that maps every input residual to a constant value zero, the NoGAM algorithm is equivalent to a simple *score-sortability* heuristic criterion, identifying leaf nodes as the  $\text{argmin}_i \mathbf{E}[s_i^2(\mathbf{X})]$ . In Appendix I.3 we corroborate our considerations by comparing the empirical performance of a *score-sortability* baseline with SCORE and NoGAM.

**Implications.** Score matching-based approaches SCORE, DAS, and NoGAM show empirical robustness in several scenarios included in our benchmark. We impute these results to the structure of the score function discussed in Section (3.2.1), and to the algorithmic design choices of these methods that exploit different magnitude in the score of a leaf compared to other nodes with children in the graph.

## 4.2 Is the choice of statistical estimators neutral?

In the previous section, we motivated the empirical observations on the robustness of methods based on the score function. Given that the DiffAN algorithm differs from SCORE only in the score estimation procedure (where the former applies probabilistic diffusion models in place of the score matching), we can explain the gap in performance of DiffAN with the other approaches based on the score as an effect of the different statistical estimation technique. From this observation, we suggest that score matching plays a crucial role in connecting the gradient of the log-likelihood with effective causal inference.

**Implications.** The choice of modular statistical estimator for causal inference procedures is not neutral. We argue that inductive bias in statistical estimators may be connected with good empirical performance, and we think that this potential connection should be further investigated in future works.

## 5 Conclusion

In this work we perform a large scale empirical study on eleven causal discovery methods that provides empirical evidence on the limits of reliable causal inference when the available data violate critical algorithmic assumptions. Our experimental findings highlight that score matching-based approaches can robustly infer the causal order from data generated by misspecified models. It would be important to have procedures for edge detection that display the same properties of robustness in diverse scenarios, and to have a better theoretical understanding of failure modes of CAM-pruning variable selection, given its broad use for causal discovery. Finally, we remark that this benchmarking is limited to the case of observational *iid* samples, and it would be of great practical interest to have equivalent empirical insights on the robustness of methods for causal discovery on sequential data in the setting of time series or passively observed interventions.

## References

- [1] Jonas Peters, Dominik Janzing, and Bernhard Schölkopf. *Elements of Causal Inference: Foundations and Learning Algorithms*. The MIT Press, 2017. ISBN 0262037319.
- [2] Judea Pearl. *Causality*. Cambridge University Press, Cambridge, UK, 2 edition, 2009. ISBN 978-0-521-89560-6. doi: 10.1017/CBO9780511803161.
- [3] Peter Spirtes. Introduction to causal inference. *Journal of Machine Learning Research*, 11(54): 1643–1662, 2010. URL <http://jmlr.org/papers/v11/spirtes10a.html>.
- [4] P. Spirtes, C. Glymour, and R. Scheines. *Causation, Prediction, and Search*. MIT press, 2nd edition, 2000.
- [5] Naftali Harris and Mathias Drton. Pc algorithm for nonparanormal graphical models. *Journal of Machine Learning Research*, 14(69):3365–3383, 2013. URL <http://jmlr.org/papers/v14/harris13a.html>.
- [6] Joseph Ramsey, Peter Spirtes, and Jiji Zhang. Adjacency-Faithfulness and Conservative Causal Inference. In *Proceedings of the 22nd Conference on Uncertainty in Artificial Intelligence*, pages 401–408, 2006.
- [7] Caroline Uhler, G. Raskutti, Peter Bühlmann, and B. Yu. Geometry of the faithfulness assumption in causal inference. *The Annals of Statistics*, 41, 07 2012. doi: 10.1214/12-AOS1080.
- [8] Hans Reichenbach. *The Direction of Time*. Mineola, N.Y.: Dover Publications, 1956.
- [9] David Maxwell Chickering. Optimal structure identification with greedy search. *J. Mach. Learn. Res.*, 3(null):507–554, mar 2003. ISSN 1532-4435. doi: 10.1162/153244303321897717. URL <https://doi.org/10.1162/153244303321897717>.
- [10] Kun Zhang and Aapo Hyvärinen. On the identifiability of the post-nonlinear causal model. In *Proceedings of the Twenty-Fifth Conference on Uncertainty in Artificial Intelligence, UAI '09*, page 647–655, Arlington, Virginia, USA, 2009. AUAI Press. ISBN 9780974903958.
- [11] Patrik Hoyer, Dominik Janzing, Joris M Mooij, Jonas Peters, and Bernhard Schölkopf. Non-linear causal discovery with additive noise models. In D. Koller, D. Schuurmans, Y. Bengio, and L. Bottou, editors, *Advances in Neural Information Processing Systems*, volume 21. Curran Associates, Inc., 2008. URL <https://proceedings.neurips.cc/paper/2008/file/f7664060cc52bc6f3d620bcdcd94a4b6-Paper.pdf>.
- [12] Shohei Shimizu, Patrik O. Hoyer, Aapo Hyvärinen, and Antti Kerminen. A linear non-gaussian acyclic model for causal discovery. *J. Mach. Learn. Res.*, 7:2003–2030, dec 2006. ISSN 1532-4435.
- [13] Jonas Peters, Joris M. Mooij, Dominik Janzing, and Bernhard Schölkopf. Causal discovery with continuous additive noise models. *J. Mach. Learn. Res.*, 15(1):2009–2053, jan 2014. ISSN 1532-4435.
- [14] Clark Glymour, Kun Zhang, and Peter Spirtes. Review of causal discovery methods based on graphical models. *Frontiers in Genetics*, 10, 2019. ISSN 1664-8021. doi: 10.3389/fgene.2019.00524. URL <https://www.frontiersin.org/articles/10.3389/fgene.2019.00524>.
- [15] Kun Zhang, Mingming Gong, Joseph Ramsey, Kayhan Batmanghelich, Peter Spirtes, and Clark Glymour. Causal discovery in the presence of measurement error: Identifiability conditions. 06 2017.
- [16] Richard Scheines and Joseph Ramsey. Measurement error and causal discovery. *CEUR workshop proceedings*, 1792:1–7, 06 2016.
- [17] Christina Heinze-Deml, Marloes H. Maathuis, and Nicolai Meinshausen. Causal structure learning. *Annual Review of Statistics and Its Application*, 5(1):371–391, 2018. doi: 10.1146/annurev-statistics-031017-100630.
- [18] Joris Mooij, Jonas Peters, Dominik Janzing, Jakob Zscheischler, and Bernhard Schölkopf. Distinguishing cause from effect using observational data: Methods and benchmarks. *Journal of Machine Learning Research*, 17:1–102, 04 2016.
- [19] Karamjit Singh, Garima Gupta, Vartika Tewari, and Gautam Shroff. Comparative benchmarking of causal discovery techniques. 08 2017.

- [20] Kun Zhang and Aapo Hyvärinen. Causality discovery with additive disturbances: An information-theoretical perspective. In Wray Buntine, Marko Grobelnik, Dunja Mladenić, and John Shawe-Taylor, editors, *Machine Learning and Knowledge Discovery in Databases*, pages 570–585, Berlin, Heidelberg, 2009. Springer Berlin Heidelberg.
- [21] Aapo Hyvärinen. Estimation of non-normalized statistical models by score matching. *Journal of Machine Learning Research*, 6(24):695–709, 2005. URL <http://jmlr.org/papers/v6/hyvarinen05a.html>.
- [22] Yingzhen Li and Richard Turner. Gradient estimators for implicit models. 05 2017.
- [23] Paul Rolland, Volkan Cevher, Matthäus Kleindessner, Chris Russell, Dominik Janzing, Bernhard Schölkopf, and Francesco Locatello. Score matching enables causal discovery of nonlinear additive noise models. In Kamalika Chaudhuri, Stefanie Jegelka, Le Song, Csaba Szepesvari, Gang Niu, and Sivan Sabato, editors, *Proceedings of the 39th International Conference on Machine Learning*, volume 162 of *Proceedings of Machine Learning Research*, pages 18741–18753. PMLR, 17–23 Jul 2022.
- [24] Francesco Montagna, Nicoletta Noceti, Lorenzo Rosasco, Kun Zhang, and Francesco Locatello. Scalable causal discovery with score matching. In *2nd Conference on Causal Learning and Reasoning*, 2023. URL <https://openreview.net/forum?id=6VvoDjLBPQV>.
- [25] Francesco Montagna, Nicoletta Noceti, Lorenzo Rosasco, Kun Zhang, and Francesco Locatello. Causal discovery with score matching on additive models with arbitrary noise. In *2nd Conference on Causal Learning and Reasoning*, 2023. URL <https://openreview.net/forum?id=rV00Bx90deu>.
- [26] Atalanti A Mastakouri, Bernhard Schölkopf, and Dominik Janzing. Necessary and sufficient conditions for causal feature selection in time series with latent common causes. In *International Conference on Machine Learning*, pages 7502–7511. PMLR, 2021.
- [27] Andreas Gerhardus and Jakob Runge. High-recall causal discovery for autocorrelated time series with latent confounders. *Advances in Neural Information Processing Systems*, 33:12615–12625, 2020.
- [28] Atalanti Mastakouri, Bernhard Schölkopf, and Dominik Janzing. Selecting causal brain features with a single conditional independence test per feature. *Advances in Neural Information Processing Systems*, 32, 2019.
- [29] Niklas Pfister, Peter Bühlmann, and Jonas Peters. Invariant causal prediction for sequential data. *Journal of the American Statistical Association*, 114(527):1264–1276, 2019.
- [30] Jakob Runge, Sebastian Bathiany, Erik Bollt, Gustau Camps-Valls, Dim Coumou, Ethan Deyle, Clark Glymour, Marlene Kretschmer, Miguel D Mahecha, Jordi Muñoz-Marí, et al. Inferring causation from time series in earth system sciences. *Nature communications*, 10(1):1–13, 2019.
- [31] Jakob Runge, Peer Nowack, Marlene Kretschmer, Seth Flaxman, and Dino Sejdinovic. Detecting and quantifying causal associations in large nonlinear time series datasets. *Science Advances*, 5(11):eaau4996, 2019.
- [32] Krzysztof Chalupka, Pietro Perona, and Frederick Eberhardt. Fast conditional independence test for vector variables with large sample sizes. *ArXiv*, abs/1804.02747, 2018.
- [33] Daniel Malinsky and Peter Spirtes. Causal structure learning from multivariate time series in settings with unmeasured confounding. In *Proceedings of 2018 ACM SIGKDD Workshop on Causal Discovery*, volume 92 of *Proceedings of Machine Learning Research*, pages 23–47, 2018.
- [34] Dehua Cheng, Mohammad Taha Bahadori, and Yan Liu. Fblg: a simple and effective approach for temporal dependence discovery from time series data. In *KDD '14*, 2014.
- [35] Jonas Peters, Dominik Janzing, and Bernhard Schölkopf. Causal inference on time series using structural equation models. *Advances in Neural Information Processing Systems*, 07 2012.
- [36] Alessio Moneta, Nadine Chlaß, Doris Entner, and Patrik Hoyer. Causal search in structural vector autoregressive models. In *NIPS Mini-Symposium on Causality in Time Series*, pages 95–114. PMLR, 2011.
- [37] Doris Entner and Patrik O Hoyer. On causal discovery from time series data using FCI. *Probabilistic graphical models*, pages 121–128, 2010.

- [38] Sébastien Lachapelle, Philippe Brouillard, Tristan Deleu, and Simon Lacoste-Julien. Gradient-based neural dag learning. In *International Conference on Learning Representations*, 2020. URL <https://openreview.net/forum?id=rklbKA4YDS>.
- [39] Xun Zheng, Bryon Aragam, Pradeep K Ravikumar, and Eric P Xing. Dags with no tears: Continuous optimization for structure learning. In S. Bengio, H. Wallach, H. Larochelle, K. Grauman, N. Cesa-Bianchi, and R. Garnett, editors, *Advances in Neural Information Processing Systems*, volume 31. Curran Associates, Inc., 2018. URL [https://proceedings.neurips.cc/paper\\_files/paper/2018/file/e347c51419ffb23ca3fd5050202f9c3d-Paper.pdf](https://proceedings.neurips.cc/paper_files/paper/2018/file/e347c51419ffb23ca3fd5050202f9c3d-Paper.pdf).
- [40] Paul Erdos and Alfred Renyi. On the evolution of random graphs. *Publ. Math. Inst. Hungary. Acad. Sci.*, 5:17–61, 1960.
- [41] Albert-Laszlo Barabasi and Reka Albert. Emergence of scaling in random networks. *Science*, 286(5439):509–512, 1999. doi: 10.1126/science.286.5439.509. URL <http://www.sciencemag.org/cgi/content/abstract/286/5439/509>.
- [42] Ulrik Brandes, Marco Gaertler, and Dorothea Wagner. Experiments on graph clustering algorithms. In Giuseppe Di Battista and Uri Zwick, editors, *Algorithms - ESA 2003*, pages 568–579, Berlin, Heidelberg, 2003. Springer Berlin Heidelberg. ISBN 978-3-540-39658-1.
- [43] D. Koller and N. Friedman. *Probabilistic Graphical Models: Principles and Techniques*. Adaptive computation and machine learning. MIT Press, 2009. ISBN 9780262013192. URL <https://books.google.co.in/books?id=7dzpHCHzNQ4C>.
- [44] Shohei Shimizu, Takanori Inazumi, Yasuhiro Sogawa, Aapo Hyvarinen, Yoshinobu Kawahara, Takashi Washio, Patrik Hoyer, and Kenneth Bollen. Directlingam: A direct method for learning a linear non-gaussian structural equation model. *Journal of Machine Learning Research*, 12, 01 2011.
- [45] Pedro Sanchez, Xiao Liu, Alison Q O’Neil, and Sotirios A. Tsaftaris. Diffusion models for causal discovery via topological ordering. In *The Eleventh International Conference on Learning Representations*, 2023. URL <https://openreview.net/forum?id=Idusfje4-Wq>.
- [46] Peter Bühlmann, Jonas Peters, and Jan Ernest. CAM: Causal additive models, high-dimensional order search and penalized regression. *The Annals of Statistics*, 42(6), dec 2014. URL <https://doi.org/10.1214/14-AOS1260>.
- [47] Jiji Zhang. Causal reasoning with ancestral graphs. *Journal of Machine Learning Research*, 9 (47):1437–1474, 2008. URL <http://jmlr.org/papers/v9/zhang08a.html>.
- [48] Xun Zheng, Chen Dan, Bryon Aragam, Pradeep Ravikumar, and Eric Xing. Learning sparse nonparametric dags. In Silvia Chiappa and Roberto Calandra, editors, *Proceedings of the Twenty Third International Conference on Artificial Intelligence and Statistics*, volume 108 of *Proceedings of Machine Learning Research*, pages 3414–3425. PMLR, 26–28 Aug 2020. URL <https://proceedings.mlr.press/v108/zheng20a.html>.
- [49] Alexander Gilbert Reisach, Christof Seiler, and Sebastian Weichwald. Beware of the simulated DAG! causal discovery benchmarks may be easy to game. In A. Beygelzimer, Y. Dauphin, P. Liang, and J. Wortman Vaughan, editors, *Advances in Neural Information Processing Systems*, 2021. URL [https://openreview.net/forum?id=wE0lVzVhMW\\_](https://openreview.net/forum?id=wE0lVzVhMW_).
- [50] Thomas Verma and Judea Pearl. Causal networks: Semantics and expressiveness. In Ross D. Shachter, Tod S. Levitt, Laveen N. Kanal, and John F. Lemmer, editors, *Uncertainty in Artificial Intelligence*, volume 9 of *Machine Intelligence and Pattern Recognition*, pages 69–76. North-Holland, 1990. doi: <https://doi.org/10.1016/B978-0-444-88650-7.50011-1>. URL <https://www.sciencedirect.com/science/article/pii/B9780444886507500111>.
- [51] Kun Zhang, Jonas Peters, Dominik Janzing, and Bernhard Schölkopf. Kernel-based conditional independence test and application in causal discovery. In *Proceedings of the Twenty-Seventh Conference on Uncertainty in Artificial Intelligence*, UAI’11, pages 804–813, Arlington, Virginia, USA, July 2011. AUAI Press.

## 527 A Assumptions connecting causal and statistical properties of the data

528 In this section, we describe in detail several crucial assumptions for causal discovery.

### 529 A.1 Global Markov Property

530 Causal discovery from pure observations requires assumptions that connect the joint distribution  
 531 of the data with their underlying causal structure. The Markov factorization of the distribution (2)  
 532 allows interpreting conditional independencies of the graph  $\mathcal{G}$  induced by the model  $\mathcal{M}$  as conditional  
 533 independencies of the joint distribution  $p_{\mathbf{X}}$ . This is known as the Global Markov Property of the  
 534 distribution  $p_{\mathbf{X}}$  with respect to the graph  $\mathcal{G}$ .

535 **Definition 2.** A distribution  $p_{\mathbf{X}}$  satisfies the Global Markov Property with respect to a DAG  $\mathcal{G}$  if:

$$\mathbf{X}_A \perp\!\!\!\perp_{\mathcal{G}} \mathbf{X}_B \mid \mathbf{X}_S \Rightarrow \mathbf{X}_A \perp\!\!\!\perp_{p_{\mathbf{X}}} \mathbf{X}_B \mid \mathbf{X}_S, \quad (14)$$

536 with  $\mathbf{X}_A, \mathbf{X}_B, \mathbf{X}_S$  disjoint subsets of  $\mathbf{X}$ ,  $\perp\!\!\!\perp_{\mathcal{G}}$  denoting *d-separation* in the graph  $\mathcal{G}$ , and  $\perp\!\!\!\perp_{p_{\mathbf{X}}}$   
 537 denoting independency in the joint distribution  $p_{\mathbf{X}}$ .

### 538 A.2 Causal faithfulness

539 A distribution  $p_{\mathbf{X}}$  that satisfies the Global Markov Property, decomposes according to the Markov  
 540 factorization of Equation (2) [50]. If the inverse holds, then we can consider the conditional inde-  
 541 pendencies observed in the distribution  $p_{\mathbf{X}}$  to be valid conditional independencies in the graph  $\mathcal{G}$ :

$$\mathbf{X}_A \perp\!\!\!\perp_{p_{\mathbf{X}}} \mathbf{X}_B \mid \mathbf{X}_S \Rightarrow \mathbf{X}_A \perp\!\!\!\perp_{\mathcal{G}} \mathbf{X}_B \mid \mathbf{X}_S. \quad (15)$$

542 If (15) is satisfied, we say that  $p_{\mathbf{X}}$  is *faithful* to the causal graph.

### 543 A.3 Causal sufficiency

544 Another fundamental assumption is the absence of unmeasured common causes in the graph. Re-  
 545 ichenbach principle [8] defines a connection between statistical and causal associations. The principle  
 546 states that given statistical association between two variables  $X, Y$ , then there exists a variable  $Z$   
 547 that causally influences both explaining all the dependence such that conditioning on  $Z$  makes them  
 548 independent. *Causal sufficiency* assumes that  $Z$  coincides with one between  $X$  and  $Y$ : resorting to  
 549 the model of Equation (1), this means that for each pair  $X_i, X_j$  there are no latent common causes.

550 Under the assumption of *causal sufficiency* of the graph and *faithful* distribution, we can use condi-  
 551 tional independence testing to infer the Markov Equivalence Class of the causal graph  $\mathcal{G}$  from the data.

## 552 B Details on the synthetic data generation

### 553 B.1 Nonlinear causal mechanisms

554 In order to simulate nonlinear causal mechanisms of an additive noise model, we sample functions  
 555 from a Gaussian process, such that  $\forall i = 1, \dots, d, f_i(X_{PA_i}) = \mathcal{N}(\mathbf{0}, K(X_{PA_i}, X_{PA_i}))$ , a mul-  
 556 tivariate normal distribution centered at zero and with covariance matrix as the Gaussian kernel  
 557  $K(X_{PA_i}, X_{PA_i})$ , where  $X_{PA_i}$  are the observations of the parents of the node  $X_i$ .

### 558 B.2 Non-Gaussian distribution of the noise terms

559 We generate data with non-Gaussian noise terms as follows: for each node  $i \in \{1, \dots, d\}$ , we  
 560 model noise terms following a Gaussian distribution  $U_i \sim \mathcal{N}(0, \sigma_i)$  with variance  $\sigma_i \sim U(0.5, 1.0)$ .  
 561 Those noise terms are then transformed via a random nonlinear function  $t$ , s.t.  $\tilde{U}_i = t(U_i)$ . In our  
 562 experiments, we sampled three different functions  $t$ , modeled as multilayer perceptrons (MLPs)  
 563 with 100 nodes in the single hidden layer, sigmoid activation functions, and weights sampled from  
 564  $U(-\alpha, \alpha)$ ,  $\alpha \in [0.5, 1.5, 3.0]$ , respectively (c.f. Fig. 2).

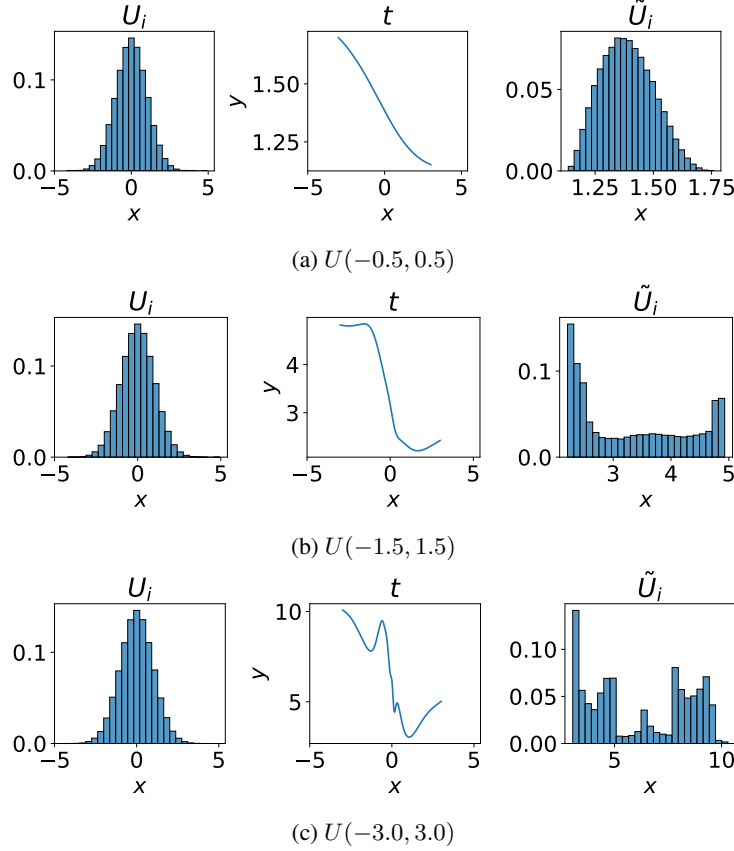

Figure 2: Gaussian noise (left) transformed via random nonlinear functions (center) to non-Gaussian iid noise (right). Weights of the MLP are sampled from either (a)  $U(-0.5, 0.5)$ , (b)  $U(-1.5, 1.5)$ , or (c)  $U(-3.0, 3.0)$ .

### 565 B.3 Algorithms for random graphs simulation

566 We use four random graph generation algorithms for sampling the ground truth causal structure  
 567 of each dataset. In particular, we consider the Erdos-Renyi (ER) model, which allows specifying  
 568 the number of nodes  $d$  and the average number of connections per node  $m$  (or, alternatively, the  
 569 probability  $p$  of connecting each pair of nodes). In ER graphs, pair of nodes have the same probability  
 570 of being connected. Scale-free graphs are generated under a preferential attachment procedure [41],  
 571 such that nodes with a higher degree are more likely to be connected with a new node, allowing  
 572 for the presence of *hubs* (i.e. high degree nodes) in the graphs. The Gaussian Random Partition  
 573 model (GRP) [42] is created by connecting  $k$  subgraphs (i.e. partitions) generated by an ER model. A  
 574 parameter  $p_{in}$  specifies the probability of connecting a pair of nodes in the same partition, while  $p_{out}$   
 575 defines the probability of connections among distinct partitions. Clusters appear when  $p_{in} \gg p_{out}$   
 576 (e.g. in our experiments we consider  $p_{in} = 0.4$ ,  $p_{out} = 0.05$ ). Finally, we consider Fully Connected  
 577 graphs, generated by sampling a topological order  $\pi$  and connecting all nodes in the graph to their  
 578 successors with a directed edge. Given a ground truth fully connected graph, the accuracy of the  
 579 inference procedure is maximally sensitive to errors in the order.

### 580 B.4 Modeling of unfaithful distributions

581 Given a ground truth causal graph, we model an unfaithful distribution of the data by enforcing  
 582 the cancellation of directed causal effects between pairs of nodes. In practice, we identify the fully  
 583 connected triplets of nodes  $X_i \rightarrow X_k \leftarrow X_j \leftarrow X_i$  in the ground truth, and we adjust the causal  
 584 mechanisms such that the direct effect of  $X_i$  on  $X_k$  cancels out. In order to clarify the implementation  
 585 details of our model, we consider a graph  $\mathcal{G}$  with vertices  $X_1, X_2, X_3$  and with the set of edges  
 586 corresponding to the fully connected graph with trivial topological order  $\pi = \{X_1, X_2, X_3\}$ . We

|        | 5 nodes     | 10 nodes | 20 nodes | 50 nodes |
|--------|-------------|----------|----------|----------|
| Sparse | $p = 0.1^*$ | $m = 1$  | $m = 1$  | $m = 2$  |
| Dense  | $p = 0.4^*$ | $m = 2$  | $m = 4$  | $m = 8$  |

\* Graphs are re-sampled such that they have at least 2 edges.

Table 2: Density schema for Erdos-Renyi graphs. The parameter  $p$  denotes the probability of an edge between each pair of nodes in the graph, and  $m$  denotes the average number of edges for each node in the graph. We scale the parameter  $m$  with the number of nodes, such that the relative density (sparsity) is similar for all graph dimensions.

allow for mixed linear and nonlinear edges with liner effect on the nodes, such the set of structural equations is defined as:

$$\begin{aligned} X_1 &:= U_1, \\ X_2 &:= f(X_1) + U_2, \\ X_3 &:= f(X_1) - X_2 + U_3, \end{aligned} \tag{16}$$

with  $f$  nonlinear function. This definition of the mechanisms on  $X_3$  cancels out  $f(X_1)$  in the structural equation. In the case of large graphs with the number of nodes  $d \in \{5, 10, 20, 50\}$  that we use in our experiments, we verify the unfaithful independencies in the data via kernel-based test of conditional independence [51], in correspondence of the pairs of nodes whose causal effect cancels out. We use a threshold of 0.05 for the conditional independence testing.

## B.5 Dataset configurations

In this section, we extend the discussion of Section 3.1.2 which presents an overview of the parameters that define the different configurations for the generation of the synthetic datasets of our benchmark. We sample the ground truth structures according to four different algorithms for random graph generation, and according to different specifications of density, number of nodes, and distribution of the noise terms. In the case of Erdos-Renyi (ER) generated graphs, we define the density of the edges relative to the number of nodes, according to the schema defined in Table 2. For the Scale-free (SF) model, we define the edge density in the graphs according to the same values of Table 2, but we do not generate SF graphs of 5 nodes. Similarly, we generate fully connected (FC) and Gaussian Random Partition (GRP) graphs only for  $\{10, 20, 50\}$  nodes. FC generation does not require specifying any parameter for the density. In the case of GRP graphs, we use  $p_{in} = 0.4$  as the probability of edges between a pair of nodes inside the same cluster, and  $p_{out} = 0.1$  as the probability of edges between a pair of nodes belonging to different clusters.

For each of the graph configurations, we sample a ground truth and a dataset of observations generated according to one of the following scenarios (described in detail in Section 3.1.1):

- Vanilla additive noise model.
- PNL model, with invertible post nonlinear function  $g(x) = x^3$  for each specied structural equation.
- LiNGAM model, where the number of structural equations with linear mechanisms is parametrized by  $\delta \in \{0.33, 0.66, 1.0\}$ . The first two values of  $\delta$  allow modeling mixed linear and nonlinear causal mechanisms, with respectively 33% and 66% of the structural equations being linear. Unless differently specified, we consider  $\delta = 1$  when referring to the LiNGAM model.
- Confounded model, where the number of confounded pairs is parametrized by  $\rho \in \{0.1, 0.2\}$ , denoting the probability of two nodes having a common cause. Unless differently specified, we consider  $\rho = 0.2$  when referring to the confounded model.
- Measurement error model, where the amount of variance explained by the additive error is parametrized by  $\gamma \in \{0.2, 0.4, 0.6, 0.8\}$ , denoting the inverse signal to noise ratio  $\gamma := \frac{\text{Var}[\epsilon_i]}{\text{Var}[X_i]}$ , with  $X_i$  and  $\epsilon_i$  defined in the structural equation (6). Unless differently specified, we consider  $\gamma = 0.8$  when referring to the measurement error model.

- Unfaithful model, as discussed in the Appendix B.4.
- Autoregressive model, defined according to the structural equation (7) in order to simulate non-*iid* samples in the data.

For each scenario, and for each parametrization that it admits, we generate a ground truth  $\mathcal{G}$  according to each of the graph configurations specified at the beginning of the section, and a corresponding pair of datasets  $\mathcal{D}$  of size 100 and 1000. The dataset generation is repeated under four possible distributions of the noise terms. In particular, each dataset has exogenous variables that are either normally distributed, or following a randomly generated non-Gaussian distribution, as discussed in Appendix B.2. Finally, in order to ensure statistically significant results, for each pair of graph and dataset configurations we generate  $\mathcal{G}, \mathcal{D}$  according to 20 different random seeds.

## C Benchmark methods

### C.1 CAM

CAM algorithm [46] infers a causal graph from data generated by an additive Gaussian noise model. First, it infers the topological ordering by finding the permutation of the graph nodes corresponding to the fully connected graph that maximizes the log-likelihood of the data. After inference of the topological ordering, a pruning step is done by variable selection with regression. In particular, for each variable  $X_j$  CAM fits a generalized additive model using as covariates all the predecessor of  $X_j$  in the ordering, and performs hypothesis testing to select relevant parent variables. This is known as the *CAM-pruning* algorithm. For graphs with size strictly larger than 20 nodes, the authors of CAM propose an additional preliminary edge selection step, known as Preliminary Neighbours Search (PNS): given an order  $\pi$ , variable selection is performed by fitting for each  $j = 1, \dots, d$  an additive model of  $X_j$  versus all the other variables  $\{X_i : X_j \succ X_i \text{ in } \pi\}$ , and choosing the  $K$  most important predictor variables as possible parents of  $X_j$ . This preliminary search step allows scaling CAM pruning to graphs of large dimensions. In our experiments, CAM-pruning is implemented with the preliminary neighbours search only for graphs of size 50, with  $K = 20$ .

### C.2 RESIT

In RESIT (regression with subsequent independence test) [13] the authors exploit the independence of the noise terms under causal sufficiency to identify the topological order of the graph. For each variable  $X_i$ , they define the residuals  $R_i = X_i - \mathbf{E}[X_i \mid \mathbf{X} \setminus \{X_i\}]$ , such that for a leaf node  $X_l$  it holds that  $R_l = U_l - \mathbf{E}[U_l]$ . The method is based on the property that under causal sufficiency, the noise variables are independent of all the preceding variables: after estimating the residuals from the data, it identifies a leaf in the graph by finding the residual  $R_l$  that is unconditionally independent of any node  $X_i, \forall i \neq l$  in the graph. Once an order is given, they select a subset of the edges admitted by the fully connected graph encoding of the ordering. We implement this final step with CAM-pruning.

### C.3 GraN-DAG

GraN-DAG [38] defines a continuous constrained optimization problem to infer the causal graph from an ANM with Gaussian noise terms. For each variable  $X_i$  in the graph, the authors estimate the parameters of the conditional distribution  $p(X_i \mid \mathbf{X} \setminus \{X_i\})$  with a neural network  $\phi_i$ . They define an adjacency matrix  $A \in \mathbb{R}^{d \times d}$  representation of the causal DAG, by finding *inactive paths* in the neural network computations, where a path is defined as the sequence of weights of the network from the input  $j$  to the output  $k$ : if zero weights are encountered in the path, then the output  $k$  is independent of the input  $j$ . If this is repeated for all paths from  $j$  to  $k$  and for all outputs  $k$ , then all paths are inactive and  $X_i$  is independent of  $X_j$  conditional on the remaining variables, meaning that  $A_{ij} = 0$ . Note that GraN-DAG in principle does not require a post-processing consisting of an edge selection procedure, given that its output is not a fully connected encoding of a topological order, but an arbitrarily sparse graph. However, in practice, it is the case that GraN-DAG output approximates a fully connected graph, with a large number of false positives with respect to the ground truth edges (see Table 5 of Appendix A.3 in Lachapelle et al. [38] for quantitative results). To account for this, the authors of the method apply the CAM-pruning step on top of their neural network graph output. In our experiments, in order to compare the goodness of the ordering encoded by the GraN-DAG output



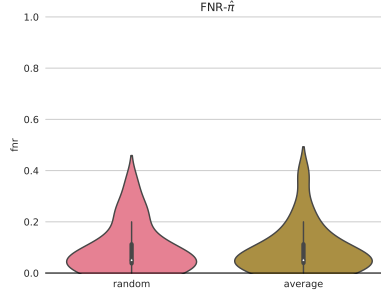

Figure 3: In order to evaluate the goodness of the inferred ordering of GraN-DAG, we sample one topological order at random between those admitted by the adjacency matrix before the CAM-pruning step. In this figure, we compare the empirical  $\text{FNR}-\hat{\pi}$  of an order randomly sampled between those admitted by the output, against the average of the  $\text{FNR}-\hat{\pi}$  computed on the set of all possible orderings admitted by the output. We see that selecting an order at random gives an unbiased representation of the average order accuracy, between those admitted by GraN-DAG output before the CAM-pruning. The violin plots refer to the  $\text{FNR}-\hat{\pi}$  evaluated on ER graphs with 10 nodes over 20 different random seeds.

before applying the CAM-pruning step, we sample one order at random between those admitted by the output adjacency matrix and compute its  $\text{FNR}-\hat{\pi}$ . Given that the order is selected at random, we consider an unbiased solution, as we show in Figure 3.

#### C.4 DirectLiNGAM

ICA-LiNGAM [44] formulates a causal discovery algorithm for the identifiable LiNGAM model, assuming linear mechanisms and non-Gaussian noise terms. The idea is that solving for  $\mathbf{X}$  the system defined in Equation (3), one obtains

$$\mathbf{X} = \mathbf{A}\mathbf{U}, \quad (17)$$

where  $\mathbf{A} = (\mathbf{I} - \mathbf{B})^{-1}$ . By standard linear ICA (independent component analysis) it is possible to find  $\mathbf{A}$ , which is equivalent to finding the weighted adjacency matrix  $\mathbf{B}$ . This intuition lies at the base of the DirectLiNGAM algorithm [44], a variation of ICA-LiNGAM that uses pairwise independence measures to find the topological order of the graph, and covariance-based regression to find the connection strengths in the matrix  $\mathbf{B}$ .

#### C.5 PC

PC algorithm (Section 5 of Spirtes et al. [4]) is a causal discovery method based on conditional independence testing that finds a CPDAG from the data. First, it starts from a fully connected undirected graph, and estimates the skeleton of the graph by removing edges between each pair of nodes  $X_i, X_j$  if it finds a subset  $\mathbf{S} \subset \mathbf{X} \setminus \{X_i, X_j\}$  such that  $X_i \perp\!\!\!\perp X_j \mid \mathbf{S}$ . Then, it finds all the v-structures  $X_i \rightarrow X_j \leftarrow X_k$  along with their directions. Finally, additional orientation rules are applied to direct as many edges as possible in the output CPDAG. In our experiments, we use a kernel-based test of conditional independence [51].

#### C.6 GES

The GES algorithm [9] (Greedy Equivalent Search) defines a discrete optimization problem over the space of all CPDAGs, and outputs the graph that maximizes the fit measure according to some score (e.g. the Bayesian Information Criterion (BIC) score). The algorithm is defined as a two steps greedy procedure. It starts from an empty graph, and in the *forward* step it adds directed edges one by one, each time selecting the directed edge that most increases the fit score. When edge addition doesn't improve the score any further, in the *backward* step it removes edges one by one until the score stops increasing. The DAG defined by this procedure is then transformed into a CPDAG, such that GES final output is a Markov equivalence class.

## C.7 SCORE

Rolland et al. [23] defines a formal criterion for the identification of the causal order of a graph underlying an additive noise models with Gaussian distribution of the noise terms  $U_i \sim \mathcal{N}(0, \sigma_i^2)$ . Under these assumptions, the score entry of a leaf node  $X_l$  is  $s_l(\mathbf{X}) = -\frac{X_l - f_l(\text{PA}_l)}{\sigma_l^2}$ . It is then easy to verify that  $\partial_{x_l} s_l(\mathbf{X}) = -\frac{1}{\sigma_l^2}$ , such that the diagonal entry of the score's Jacobian associated to a leaf node is a constant. Based on this relation, a formal criterion identifying leaf nodes holds:

**Lemma 1** (Lemma 1 of [23]). *Let  $\mathbf{X}$  be a random vector generated according to an identifiable ANM with exogenous noise terms  $U_i \sim \mathcal{N}(0, \sigma_i^2)$ , and let  $X_i \in \mathbf{X}$ . Then*

$$\text{Var} [\partial_{x_i} s_i(\mathbf{X})] = 0 \iff X_i \text{ is a leaf, } \forall i = 1, \dots, d. \quad (18)$$

The Lemma is exploited by SCORE algorithm for estimation of the topological order, given a dataset of i.i.d. observations  $X \in \mathbb{R}^{n \times d}$ : first it estimates the diagonal elements of the Jacobian matrix of the score  $J(s(\mathbf{X}))$  via score matching [22]. Then, it identifies a leaf in the graph as the  $\text{argmin}_i \text{Var}[\partial_{x_i} s_i(\mathbf{X})]$ , which is removed from the graph and assigned a position in the order vector. By iteratively repeating this two steps procedure up to the source nodes, all variables in  $\mathbf{X}$  end up being assigned a position in the causal ordering. Finally, SCORE applies the CAM-pruning algorithm to select a subset of the edges in the fully connected DAG encoding of the inferred topological order.

## C.8 NoGAM

Montagna et al. [25] proposes a generalization of SCORE, defining a formal criterion for the identification of leaf nodes in a graph induced by an additive noise model without restrictions on the distribution of the noise terms. After some manipulations, it can be shown that the score entry of a leaf  $X_l$  defined in Equation (9) satisfies

$$s_l(\mathbf{X}) = \partial_{U_l} \log p_l(U_l), \quad (19)$$

such that observations of the pair  $(U_l, s_l(\mathbf{X}))$  can be used to learn a predictor of the score entry. For an additive noise model, the authors show that the noise term of a leaf is equal to the residual defined as:

$$R_l := X_l - \mathbf{E}[X_l \mid \mathbf{X} \setminus X_l]. \quad (20)$$

Then, it is possible to find a consistent approximator of the score entry of a leaf node using  $R_l$  as the only predictor.

**Lemma 2** (Lemma 1 of [25]). *Let  $\mathbf{X}$  be a random vector generated according to an identifiable ANM, and let  $X_i \in \mathbf{X}$ . Then*

$$\mathbf{E} \left[ (\mathbf{E}[s_i(\mathbf{X}) \mid R_i] - s_i(\mathbf{X}))^2 \right] = 0 \iff X_i \text{ is a leaf.}$$

Similarly to SCORE, NoGAM algorithm defines a procedure for estimation of the topological order by iterative identification of leaf nodes, which are found as the  $\text{argmin}_i \mathbf{E} \left[ (\mathbf{E}[s_i(\mathbf{X}) \mid R_i] - s_i(\mathbf{X}))^2 \right]$ . In practice, the residuals  $R_i, i = 1, \dots, d$ , can be estimated by any regression algorithm, whereas the score is approximated by score matching with Stein identity [22].

## C.9 DAS

Montagna et al. [24] defines a condition on the Jacobian of the score function that identifies the edges of the graph induced by an additive noise model with Gaussian distribution of the noise terms, given a valid causal order.

**Lemma 3** (Lemma 1 of [24]). *Let  $\mathbf{X}$  be a random vector generated according to an identifiable ANM with exogenous noise terms  $U_i \sim \mathcal{N}(0, \sigma_i^2)$ , and let  $X_l \in \mathbf{X}$  be a leaf node. Then:*

$$\mathbf{E} [\partial_{x_j} s_l(\mathbf{X})] \neq 0 \iff X_j \in \text{PA}_l(\mathbf{X}), \quad \forall j \in \{1, \dots, d\} \setminus \{l\} \quad (21)$$

In practice, off-diagonal elements of the Jacobian matrix contain information about conditional independencies of the variables in the DAG, such that they define a condition of identification of the graph edges. Given the ordering procedure of SCORE, DAS (acronym for Discovery At Scale) defines an algorithm that can map the score function to a unique causal graph with directed edges: in practice, condition (21) of Lemma 3 is verified via hypothesis testing for the mean equals to zero. Note that, despite the fact that this approach provides a consistent estimator of the causal graph, the authors of DAS retain a CAM-pruning step on top of their edge selection procedure based on Lemma 3, in order to reduce the number of false positives of the inferred output. The benefit of DAS preliminary edge detection is that it reduces the computational costs of CAM-pruning, which is cubic in the number of nodes in the graph, such that it doesn't scale well to high dimensional graphs. Overall, given an input dataset  $X \in \mathbb{R}^{n \times d}$ , with  $n$  number of samples and  $d$  number of nodes in the graph, DAS computational complexity is  $\mathcal{O}(dn^3 + d^2)$ , whereas, for the SCORE algorithm this is  $\mathcal{O}(dn^3 + nd^3)$ .

## C.10 Random Baseline

In our experimental analysis of Section 4, we consider the performance of a random baseline in terms of F1 score and FNR- $\hat{\pi}$  accuracy of the order (Figure 1). Our random baseline is defined as follows. Given a graph with  $d$  variables, we sample a random topological order  $\pi$  as a permutation of the vector of elements  $X_1, \dots, X_d$ . Then, given the fully connected graph admitted by the order, with the set of edges  $\mathcal{E}_\pi = \{X_{\pi_i} \rightarrow X_{\pi_j} : X_{\pi_i} \prec X_{\pi_j}, \forall i, j = 1, \dots, d\}$ , for each pair of connected nodes we sample a Bernoulli random variable  $Y$  with parameter  $p = 0.5$ , such that the edge is removed for  $Y = 0$ .

## D Metrics definition

For the evaluation of the experimental results of our benchmark, we consider the F1 score, the false positive (FP) and false negative (FN) rates of the inferred graph, and the false negative rate FNR- $\hat{\pi}$  of the fully connected encoding of the output topological order. In order to specify the F1 score, we need a definition of FP, FN, and true positive (TP), that applies to both undirected and directed edges, given that we evaluate both DAGs and CPDAGs.

- We define as TP any predicted edge that is in the skeleton of the ground truth graph (i.e. the set of edges that doesn't take direction into account).
- We define the FPs as the edges in the skeleton of the predicted graph that are not in the skeleton of the ground truth graph. Note that this definition of FP doesn't penalize undirected edges or edges inferred with reversed direction.
- We define as FN a pair of nodes that are disconnected in the predicted skeleton while being connected in the ground truth. Additionally, we count as false negatives inferred edges whose direction is reversed with respect to the DAG ground truth.

Then, the F1 score is defined as the ratio  $\frac{TP}{TP+0.5(FN+FP)}$ .

## E Possible generalisation of NoGAM to the PNL model

Proposition 1 of Section 3.2.1 suggests that it is possible to generalize Lemma 2 and, accordingly, the NoGAM algorithm, to the case of the post nonlinear model.

### E.1 Proof of Proposition 1

*Proof.* Let  $\mathbf{X} \in \mathbb{R}^d$  be a random vector generated by the post nonlinear model of Equation (5). Given the Markov factorization of Equation (2), the logarithm of the joint distribution  $p_{\mathbf{X}}$  satisfies the following equation:

$$\log p_{\mathbf{X}}(\mathbf{X}) = \sum_{i=1}^d \log p_{x_i}(X_i).$$

Then, for a node  $X_i$  in the graph the score entry  $s_i$  is defined according to Equation (8), whereas given a leaf node  $X_l$  in the graph,  $s_l$  satisfies the following:

$$s_l(\mathbf{X}) := \partial_{x_l} \log p_{\mathbf{X}}(\mathbf{X}) = \partial_{x_l} \log p_l(X_l | \text{PA}_l). \quad (22)$$

Our goal is to show that  $\partial_{x_l} \log p_l(X_l | \text{PA}_l) = \partial_{x_l} \log p_l(U_l)$ , with  $U_l = g^{-1}(X_l) - f_l(\text{PA}_l)$  and  $g^{-1}$  the inverse of the postnonlinear function  $g$  (which is invertible by modeling assumption). As a notational remark, in what follows we will drop any sub-index on the distribution of the random variables, which we distinguish by their argument. Also, we denote *realizations* of random variables (or random vectors) with lowercase letters (e.g.  $x_l$  is the value of the random variable  $X_l$ ). We rewrite the distribution of  $X_l$  conditional on its parents by marginalizing over all values of  $U_l$ :

$$p(x_l | \text{pa}_l) = \int_{u_l} p(x_l | \text{pa}_l, u_l) p(u_l) du_l \quad (23)$$

$$= \int_{u_l} p(x_l | \text{pa}_l, u_l) p(u_l) \mathbb{1}(x_l = g(f_l(\text{pa}_l) + u_l)) du_l \quad (24)$$

$$= \int_{u_l} p(x_l | \text{pa}_l, u_l) p(u_l) \mathbb{1}(u_l = g^{-1}(x_l) - f_l(\text{pa}_l)) du_l, \quad (25)$$

with  $\mathbb{1}$  being the indicator function. Being  $g$  an invertible function, the value of  $u_l$  equals to  $g^{-1}(x_l) - f_l(\text{pa}_l)$  is unique, which implies that  $p(x_l | \text{pa}_l, u_l) = 0$  if  $u_l \neq g^{-1}(x_l) - f_l(\text{pa}_l)$ , else  $p(x_l | \text{pa}_l, u_l) = 1$ . Let us denote  $u_l^* := g^{-1}(x_l) - f_l(\text{pa}_l)$ . Then, the integral in Equation 25 simply becomes:

$$p(x_l | \text{pa}_l) = \int_{u_l} dp(u_l) \mathbb{1}(u_l = u_l^*) = p(u_l^*). \quad (26)$$

Thus,  $\partial_{x_l} \log p(X_l | \text{PA}_l) = \partial_{x_l} \log p(U_l)$ .  $\square$

## E.2 Discussion

Proposition 1 derives a connection between Lemma 2 defined by Montagna et al. [25] for identifiable additive noise models to the case of a PNL model. Note that the authors define a consistent estimator of  $s_l$  score function of a leaf node  $X_l$  from the residual  $R_l := X_l - \mathbf{E}[X_l | \mathbf{X} \setminus X_l]$ , which satisfies  $R_l = U_l$  in the case of an ANM with noise terms centered at zero. In general, the latter equality does not hold for a post nonlinear model, meaning that regression of a leaf variable against all the other variables of  $\mathbf{X}$  does not guarantee a consistent estimation of the disturbance on the leaf structural equation. This implies that, as is, NoGAM doesn't provide theoretical guarantees of consistent estimation of the topological order of a PNL model.

## F Proof of Proposition 2

We define two lemmas preliminary to the proof of Proposition 2.

**Lemma 4.** *Let  $\mathbf{X} \in \mathbb{R}^d$  be generated according to an SCM  $\mathcal{M}$  that satisfies score-sortability, and let  $\mathcal{G}$  be the graph induced by the model. Then, there exists a leaf node of  $\mathcal{G}$  that is score-identifiable.*

*Proof.* By contradiction, let's say that the node  $X_l$  with  $l = \text{argmin}_i \text{Var}[s_i(\mathbf{X})]$  is not a leaf node. Then, the causal order  $\pi$  where  $X_l$  is a successor of all other nodes in the graph, is not a correct ordering, implying that the model is not *score-sortable*.  $\square$

**Lemma 5.** *Let  $\mathbf{X} \in \mathbb{R}^d$  be generated according to an SCM  $\mathcal{M}$  that satisfies score-sortability, and let  $\mathcal{G}$  be the graph induced by the model. Let  $\mathcal{M}_{\setminus \{l\}}$  the model defined removing the leaf node  $X_l$  from the set of structural equations of  $\mathcal{M}$ . Then, the model  $\mathcal{M}_{\setminus \{l\}}$  is score-sortable.*

*Proof.* By contradiction, let's assume that  $\mathcal{M}_{\setminus \{l\}}$  does not satisfy *score-sortability*, such that the node  $X_m$  with  $m = \text{argmin}_{i=1, \dots, l-1, l+1, \dots, d} \text{Var}[s_i(\mathbf{X})]$  is not a leaf node in the graph  $\mathcal{G}_{\setminus \{l\}}$  induced by  $\mathcal{M}_{\setminus \{l\}}$ . Then, any topological order  $\pi$  with  $X_m$  successor of all nodes  $X_i, i = 1, \dots, l-1, l+1, \dots, d$ , is a wrong topological ordering of the graph  $\mathcal{G}$ . This implies that  $\mathcal{M}$  is not *score-sortable*.  $\square$

815 Now, we present the proof of Proposition 2.

*Proof.* (Proof of Proposition 2.) By Lemma 4, being  $\mathcal{M}$  a *score-sortable* model, there exists a leaf  $X_l$  such that  $l := \operatorname{argmin}_i \operatorname{Var}[s_i(\mathbf{X})]$ . Then,

$$\operatorname{Var}[\partial_l \log p_l(X_l \mid \text{PA}_l)] \leq \operatorname{Var}[\partial_i \log p_i(X_i \mid \text{PA}_i)] + \sum_{k \in \text{CH}_i} \operatorname{Var}[\partial_k \log p_k(X_k \mid \text{PA}_k)] + C,$$

816 for all  $i = 1, \dots, d$ . Moreover, by previous Lemma 5, the model  $\mathcal{M}_{\setminus \{l\}}$  is *score-sortable*. Thus  
 817 there exists an index  $m \in \{1, \dots, l-1, l+1, \dots, d\}$  such that  $X_m$  is a leaf and  $\operatorname{Var}[s_m(\mathbf{X}_{\setminus \{l\}})] \leq$   
 818  $\operatorname{Var}[s_i(\mathbf{X}_{\setminus \{l\}})]$ ,  $\forall i = 1, \dots, l-1, l+1, \dots, d$ . Then, the topological ordering defined by iterative  
 819 identification of leaf nodes with Lemma 4 and Lemma 5 on the subgraphs resulting by removal of a  
 820 leaf node, is correct with respect to the model  $\mathcal{M}$ .  $\square$

## 821 G Tuning of the hyperparameters in the experiments

822 The methods included in the benchmark require the tuning of several hyperparameters for the  
 823 inference procedure. In particular, PC, DAS, SCORE, NoGAM, RESIT, GraN-DAG, CAM, and  
 824 DiffAN require a threshold  $\alpha$  over the p-value of the statistical test used for the edge selection  
 825 procedure. Instead, GES applies a regularization term weighted by  $\lambda$  to its score, which penalizes the  
 826 number of edges included in the inferred graph: the higher the value of  $\lambda$ , the sparser the solution.  
 827 Given that the tuning of both  $\alpha$  and  $\lambda$  requires prior knowledge about the sparsity of the ground truth,  
 828 there is no established procedure for finding their optimal values in real-world settings, where the  
 829 ground truth is not accessible. Thus, in order to enable a fair comparison between all the methods, we  
 830 always select the optimal value of  $\alpha \in \{0.001, 0.01, 0.05, 0.1\}$  and  $\lambda \in \{0.05, 0.5, 2, 5\}$  over each  
 831 benchmark dataset. In Section H we discuss the stability of the algorithms with respect to choices of  
 832 these hyperparameters.

833 GraN-DAG and DiffAN both define a learning procedure over the data, which requires the tuning of  
 834 several training hyperparameters, the most important of which is the learning rate  $\eta$ . For each dataset,  
 835 this is optimized over the loss function on a held-out validation set, without accessing the ground  
 836 truth graph.

## 837 H Stability with respect to hyperparameters choices

838 Most causal discovery methods come with hyperparameters that alleviate minor assumption violations  
 839 (e.g. sparsity regularization or higher thresholds on p-values in statistical tests). In the absence of  
 840 background knowledge, tuning these hyperparameters is an art that often relies on pre-conceptions  
 841 about reasonable solutions. In this section, we investigate the impact of these hyperparameters on the  
 842 accuracy of the output graph. GES penalizes dense solution with a regularization term in its score,  
 843 weighted by a hyperparameter  $\lambda$  that can not be tuned in the absence of the ground truth. Similarly,  
 844 an  $\alpha$  threshold on p-values for statistical tests for edge selection is required by all the benchmarked  
 845 methods (excluding GES and DirectLiNGAM) and can not be tuned without knowledge of the ground  
 846 truth. In this section, we analyze the inference F1 score by fixing  $\alpha$  and  $\lambda$  to the commonly accepted  
 847 default values of 0.05 and 0.5 respectively. In Figure 4 we summarise the absolute value of the  
 848 difference between the F1 score obtained with hyperparameters optimized on the ground truth of  
 849 each dataset, against the F1 score yielded by inference with the default  $\alpha$  and  $\lambda$  values (denoted with  
 850  $|\text{f1}_{\text{diff}}|$  in the plots). According to our empirical findings, in the case of graphs with at least 10 nodes,  
 851 the median of this difference is in general lower than 0.1, and most of the time close to 0. Sparse  
 852 graphs seem to be more affected in their performance by the hyperparameters choice: this means  
 853 that using the default  $\alpha$  and  $\lambda$  causes an increase of false positives in the output graph. Bühlmann  
 854 et al. [46] shows that under correct topological order, a graph whose set of edges is a superset of the  
 855 ground truth still provides consistent estimates of the causal effects, such that increasing the false  
 856 positives doesn't affect the outcome of downstream tasks, but only the statistical efficiency of the  
 857 inference. Given that estimation of the topological ordering is not affected by the choice of  $\alpha$  and  $\lambda$   
 858 values, we suggest that the role of hyperparameters value is in this respect marginal with respect to  
 859 the task of interest.

860 **Implications.** We observe remarkable stability of the benchmarked methods with respect to the  
 861 choice of their hyperparameters. The biggest drops in F1 score are observed on sparse graphs,

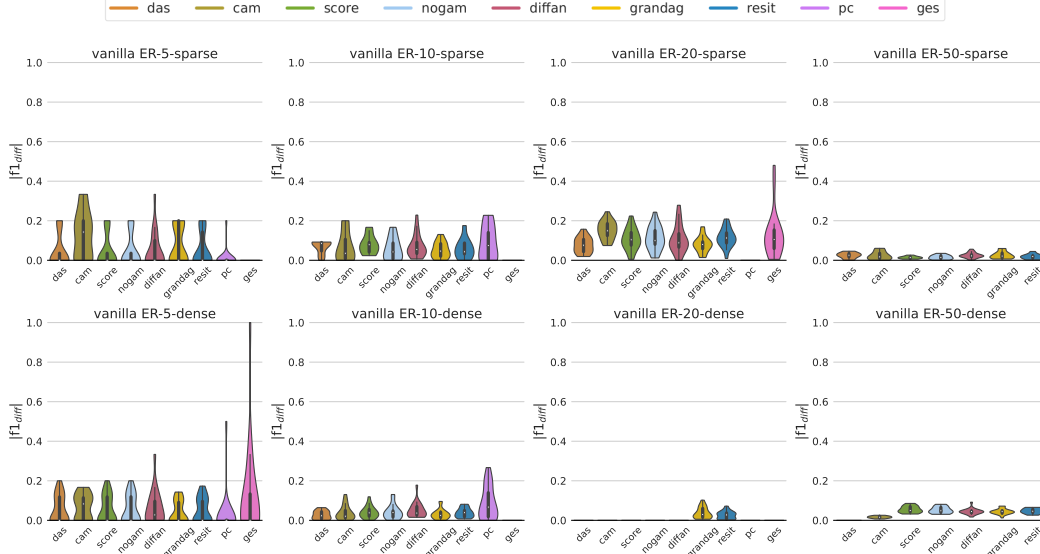

Figure 4: The violin plots in the figure represent the difference between the F1 score of a method running inference with hyperparameters optimized using the ground truth, versus the F1 score of the same method using a default value of the hyperparameters. We denote this difference with  $|f1_{diff}|$ . In the case of GES, we define as default  $\lambda = 0.5$ . For all the remaining methods, the default alpha threshold is defined as  $\alpha = 0.05$ . The violin plots refer to the inference performance on datasets and graphs generated according to 20 different random seeds. Results in the table are on data generated from the vanilla scenario, and we consider Erdos-Renyi graphs with the number of nodes in  $\{5, 10, 20, 50\}$  in the dense and sparse settings.

meaning that the default parameters cause an increase of false positives, which nevertheless does not affect the downstream task of interest of consistent estimation of causal effects.

## I Other experimental results on Erdos-Renyi graphs

In this section, we present additional experimental results on Erdos-Renyi graphs.

### I.1 The effect of non-*iid* distribution of the data

Figure 1f (right) illustrates that all the methods included in our benchmark do not perform well on data sampled from a non-*iid* distribution generated according to the autoregressive model of Equation (7): F1 score and  $FNR-\hat{\pi}$  are indeed similar to that of the random baseline. It clearly appears that none of the presented algorithms provide guarantees of good empirical performance in the setting of non-*iid* distribution of the data.

### I.2 Experiments under arbitrary distribution of the noise terms

In Section 2.2 we discussed the effect of the distribution of the noise terms on the identifiability of the causal graph underlying an SCM. Given that the assumption of Gaussian distribution of the disturbances is often not satisfied in real datasets, it is important to provide empirical evidence on the performance of the benchmarked methods on data generated with an arbitrary distribution of the noise. In this section, we discuss experiments on data generated with the noise terms that are *iid* samples from the distribution of Figure 2c. Similar to Section 4, we analyze results on ER graphs with 20 nodes, with experiments repeated over 20 random seeds. In this section, we include results of DirectLiNGAM, on both linear and nonlinear SCMs.

Figure 5 illustrates the  $FNR-\pi$  score of the inferred topological order on data generated according to the vanilla model with non-Gaussian noise terms. Under these conditions, NoGAM and RESIT provide theoretical guarantees of consistent estimate of the causal ordering. Similarly, PC and GES do not make explicit assumptions on the distribution of the noise terms (despite the fact that

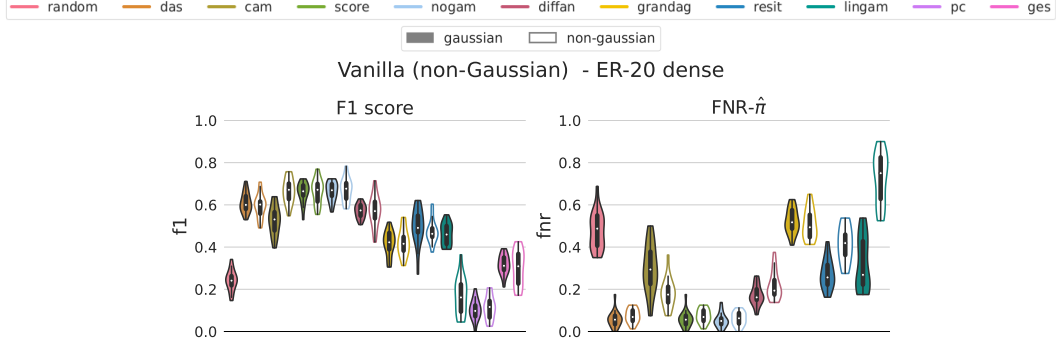

Figure 5: F1 score and  $\text{FNR}-\hat{\pi}$  on data generated with non-Gaussian distribution of the noise terms (c.f. Figure 2c). For each method, we also display the violin plot of its performance on the *vanilla* scenario with Gaussian noise terms, with transparent color. F1 score (the higher the better) and  $\text{FNR}-\hat{\pi}$  (the lower the better) are evaluated over 20 seeds on Erdos-Renyi dense graphs with 20 nodes (ER-20 dense).  $\text{FNR}-\hat{\pi}$  is not computed for GES and PC methods, whose output is a CPDAG.

GES optimizes a Gaussian likelihood). SCORE, DiFFAN, DAS, and CAM instead are limited by restrictions on the noise terms, which are required to be normally distributed. However, Figure 5 (right) shows that, except for CAM, they can estimate the order with accuracy comparable to that achieved in the case of *vanilla* generated data, with Gaussian distribution of the disturbances. These observations are in line with the experimental findings in Montagna et al. [25], which shows how the structure of the score entries of leaf nodes can still be exploited by SCORE for inference on data generated under arbitrary noise distribution. Our experimental results agree with this intuition: surprisingly, SCORE ordering ensures better  $\text{FNR}-\hat{\pi}$  accuracy than RESIT, despite the latter being explicitly designed to be insensitive to the distribution of the noise terms. Interestingly, we notice that the median of the violin plot referred to DirectLiNGAM in Figure 5 (right) is close to that of RESIT and CAM: this suggests that in the realistic scenario of mixed linear and nonlinear mechanisms with non-Gaussian additive disturbances, we can expect DirectLiNGAM to give performance significantly better than several methods designed to perform on nonlinear ANM. Figure 5 (left), shows that the in the case of methods whose ordering accuracy is comparable to the Gaussian case, the F1 score after pruning is also comparable to that on Gaussian data. This means that CAM-pruning is robust with respect to arbitrary distributions of the noise terms. Additional experimental results on data generated according to the misspecified scenarios of Section 3.1.1 with non-Gaussian distribution of the disturbances, are presented in Figure 6.

**Implications.** Most of the benchmarked methods are capable of robust inference on datasets generated by an ANM with non-Gaussian noise terms. DirectLiNGAM shows remarkable performance, comparable to that of several methods designed for inference on nonlinear additive noise models.

### I.3 Experiments with score-sortability

In this section, we present the experimental results of a simple ordering algorithm, that we name ScoreSort, based on the *score-sortability* criterion defined in Section 4.1.1. Given the random vector  $\mathbf{X} \in \mathbb{R}^d$  generated according to a structural causal model, the ScoreSort baseline identifies the index of a leaf node  $l$  as the  $\text{argmin}_i \text{Var}[s_i(\mathbf{X})]$ . Then it removes the leaf node  $X_l$  from the set of vertices of the graph, and identifies the next leaf with the  $\text{argmin}$  of the variance of the score vector of the remaining set of nodes. Identification of leaf nodes according to this procedure over the  $d$  (sub)graphs obtained by the iterative leaves removal yields a topological ordering  $\pi$  for the graph  $\mathcal{G}$  underlying the SCM. If the model is *score-sortable*, then, according to Proposition 2, the causal order  $\pi$  is correct with respect to the graph. Details on ScoreSort are presented in the Algorithm box 1. In practice, ScoreSort estimates the score vector  $\hat{s}$  according to the same score-matching algorithm used by SCORE and NoGAM, which is based on the Stein identity [22].

Figure 7 compares ScoreSort performance with NoGAM and SCORE ordering algorithms, on data generated according to the vanilla and misspecified scenarios of Section 3.1.1. In line with our considerations in the discussion on score matching robustness in Section 4.1.1, we observe

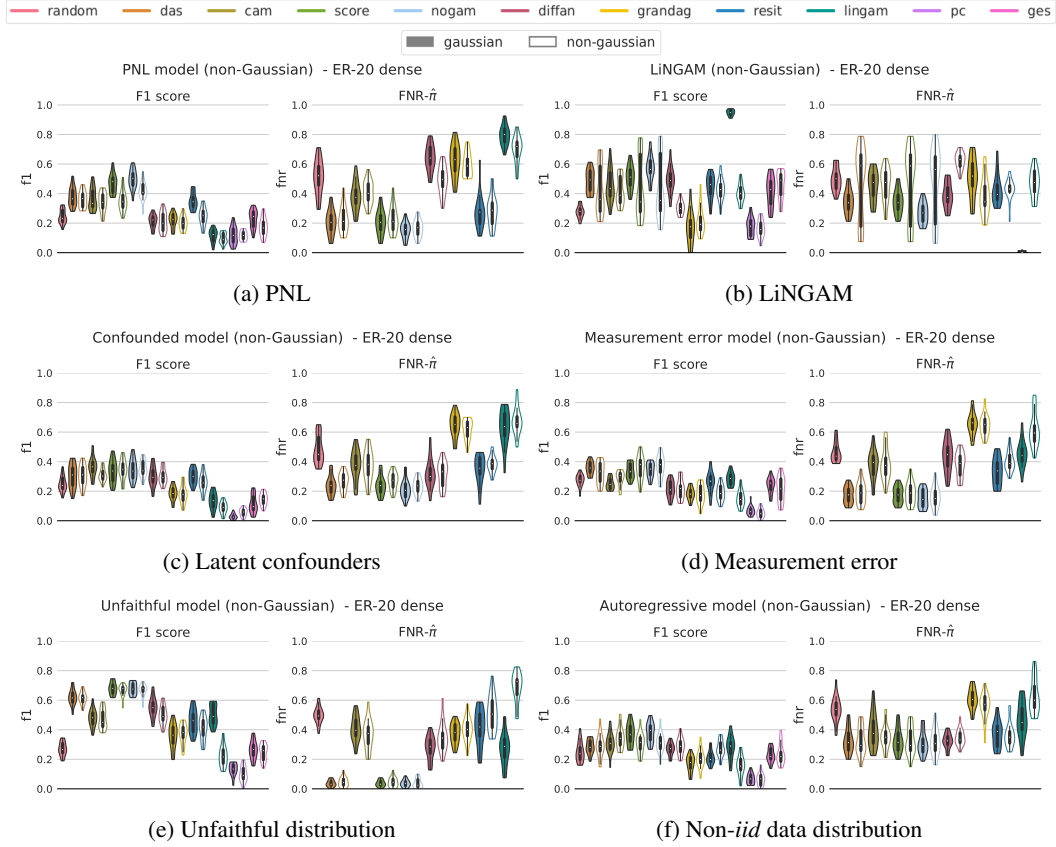

Figure 6: Experimental results on the misspecified scenarios with non-Gaussian distribution of the noise terms. For each method, we also display the violin plot of its performance on the same misspecified scenario under Gaussian distribution of the noise terms, with transparent color. F1 score (the higher the better) and  $\text{FNR}-\hat{\pi}$  (the lower the better) are evaluated over 20 seeds on Erdos-Renyi dense graphs with 20 nodes (ER-20 dense).  $\text{FNR}-\hat{\pi}$  is not computed for GES and PC, methods whose output is a CPDAG.

that ScoreSort  $\text{FNR}-\hat{\pi}$  accuracy is comparable, with statistical significance, to that of SCORE and NoGAM. This is true both in the case of data generated under vanilla and misspecified scenarios.

## J Experiments on SF, GRP, and FC graphs

In this section, we analyze the F1 score and  $\text{FNR}-\hat{\pi}$  accuracy of the benchmarked methods in the case when the ground truth graph is generated with Scale-free, Fully Connected, and Gaussian Random Partitions algorithms.

### J.1 Experiments on Scale-free graphs

Figure 8 illustrates the F1 score and  $\text{FNR}-\hat{\pi}$  on SF graphs. We see that similar to the case of ER networks, score matching-based methods show remarkable robustness in the inferred order in the case of several misspecified scenarios, particularly, on data generated by the PNL (Figure 8a right), measurement error (Figure 8d right), and unfaithful models (Figure 8e right). However, we notice two significant differences with respect to the conclusions that we derived in the case of ER graphs in Section 4, Figure 1: in the case of the LiNGAM model, SCORE, DAS and NoGAM display  $\text{FNR}-\hat{\pi}$  accuracy that is remarkably close to that on vanilla data (Figure 8b right), whereas their decrease in performance in the case of latent confounders effects (Figure 8c right), is worse than that observed on ER graphs. Interestingly, the results on the F1 score show that DAS, SCORE, NoGAM, and DiffAN performance is surprisingly good (with respect to the random baseline) across all the misspecified scenarios, which suggests good performance of CAM-pruning on SF graphs. Moreover, we see that



---

**Algorithm 1** ScoreSort algorithm for inference of the causal order

---

```

Input: data matrix  $X \in \mathbb{R}^{n \times d}$ 
 $\pi \leftarrow []$ 
 $nodes \leftarrow [1, \dots, d]$ 
for  $i = 1, \dots, d$  do
     $\hat{s} \leftarrow \text{score-matching}(X)$ 
     $l_{index} \leftarrow \text{argmin Var}[\hat{s}]$ 
     $l \leftarrow nodes[l_{index}]$ 
     $\pi \leftarrow [l, \pi]$ 
    Remove  $l_{index}$ -th column from  $X$ ; Remove  $l$  from  $nodes$ 
end for
 $\pi \leftarrow \text{reverse}(\pi)$  (first node is a source, last node is a leaf)
return  $\pi$ 

```

---

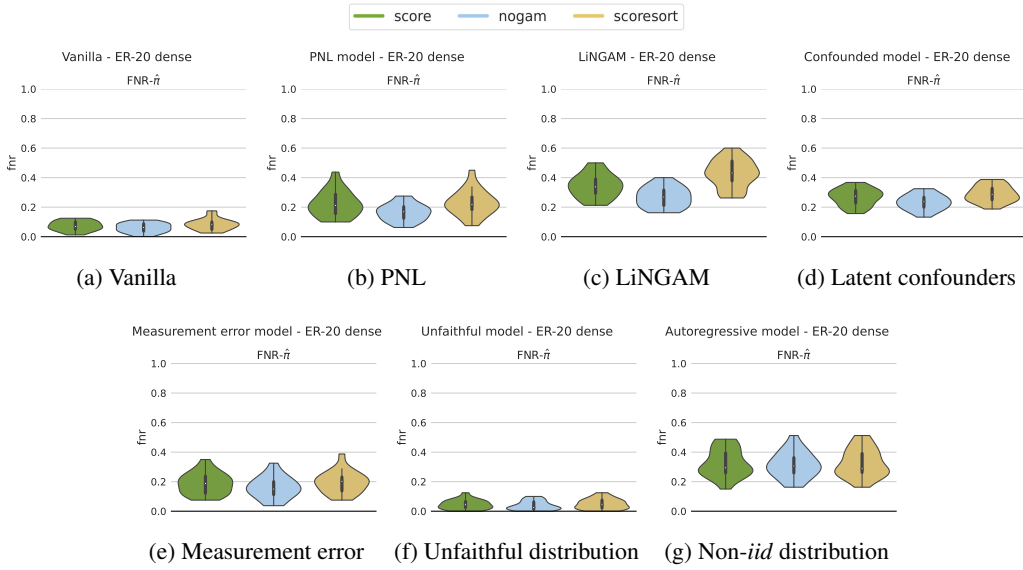

Figure 7: Experiments on *score-sortability*. We compare the  $\text{FNR}-\hat{\pi}$  accuracy of the simple ScoreSort baseline (c.f. Algorithm 1) with SCORE and NoGAM algorithms performance. The violin plots are evaluated over 20 seeds on Erdos-Renyi dense graphs with 20 nodes (ER-20 dense).

939 GraN-DAG and RESIT inference procedure is close to that of the random baseline in almost all  
940 the misspecified scenarios: this is also explained by the poor performance of these two methods on  
941 vanilla data and SF graphs (illustrated in the transparent violin plots of Figure 8).

942 **Implications.** Score-matching based approaches show remarkable robustness even in the case of  
943 SF graphs. Interestingly, CAM-pruning performance on SF graphs is generally better than the one  
944 relative to ER-generated ground truths, such that the observed F1 score is often better than random.  
945 We also observe that RESIT and GraN-DAG ordering ability is negatively affected by the SF ground  
946 truth, in comparison to the case of ER graphs.

## 947 J.2 Experiments on fully connected graphs

948 In the case of fully connected graphs, the ground truth admits a unique topological ordering. This  
949 means that we expect to observe an increase in the false negative rate  $\text{FNR}-\hat{\pi}$ , with respect to the  
950 results on ER graphs of Figure 1. This is in line with our empirical evidence, as illustrated in Figure 9.  
951 However, we see that score matching-based approaches still show robust performance in the inference  
952 of the ordering with respect to misspecified scenarios, except for the case of data generated according  
953 to the LiNGAM ground truth model. Notably, the F1 score accuracy of GES is consistently better

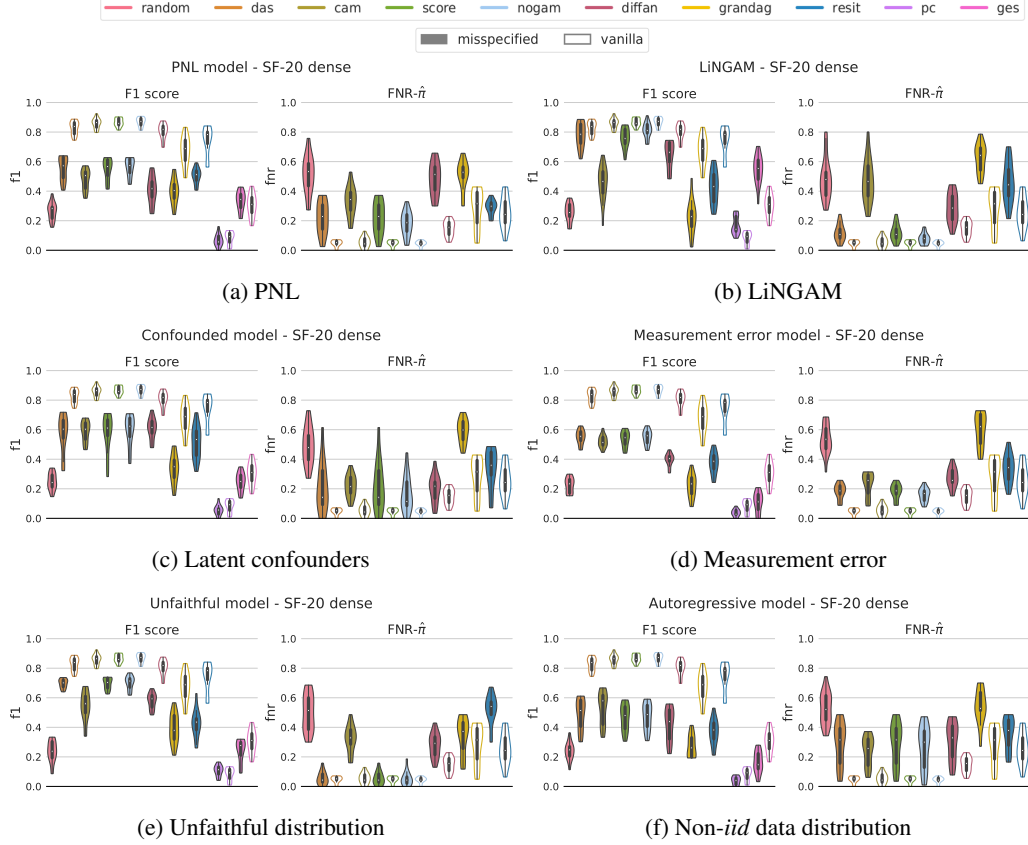

Figure 8: Experimental results on the misspecified scenarios. For each method, we also display the violin plot of its performance on the *vanilla* scenario with transparent color. F1 score (the higher the better) and FNR- $\hat{\pi}$  (the lower the better) are evaluated over 20 seeds on Scale-free dense graphs with 20 nodes (SF-20 dense). FNR- $\hat{\pi}$  is not computed for GES and PC methods, whose output is a CPDAG. Note that DirectLiNGAM performance does not appear, as both the linear mechanisms and non-Gaussian noise assumptions are violated.

than that of all the other methods, across every scenario. This is to be understood with the fact that the unpenalized BIC score optimized by GES always improves by increasing the number of edges in the graph. Given that we optimize the regularizer term  $\lambda$  on each dataset, the optimal  $\lambda$  value will naturally privilege the densest solutions. Different is the case for methods that rely on CAM-pruning, which display an F1 score consistently lower than the random baseline, except for the case of data generated by the unfaithful and LiNGAM models.

**Implications.** Score matching-based approaches are in general robust to misspecifications of the scenario in the case of a fully connected ground truth. GES shows a remarkable performance, that is partly explained by the optimization of the loss penalization term directly on the ground truth. Finally, we observe that the CAM-pruning step is negatively affected by the large density of the graphs.

### J.3 Experiments on GRP graphs

In Figure 10 we see that score matching-based methods and CAM algorithm display better robustness in the inference of the order than the remaining approaches, in reference to all of the benchmarked scenarios. The FNR- $\hat{\pi}$  of RESIT, GraN-DAG, and DiffAN are significantly close to the random baseline for data generated according to most of the ground truth models (with the exception of DiffAN on the LiNGAM model and GraN-DAG on unfaithful samples). In terms of F1 score, most of the methods show good capability of inferring the ground truth graph, even in the case of data generated under assumption violations. Note that the F1 score of the random ground truth is remarkably bad, if compared to the case of SF, FC, and ER graphs. This is in line with the cluster structure of GRP graphs: given that the random baseline connects pair of nodes all with the same

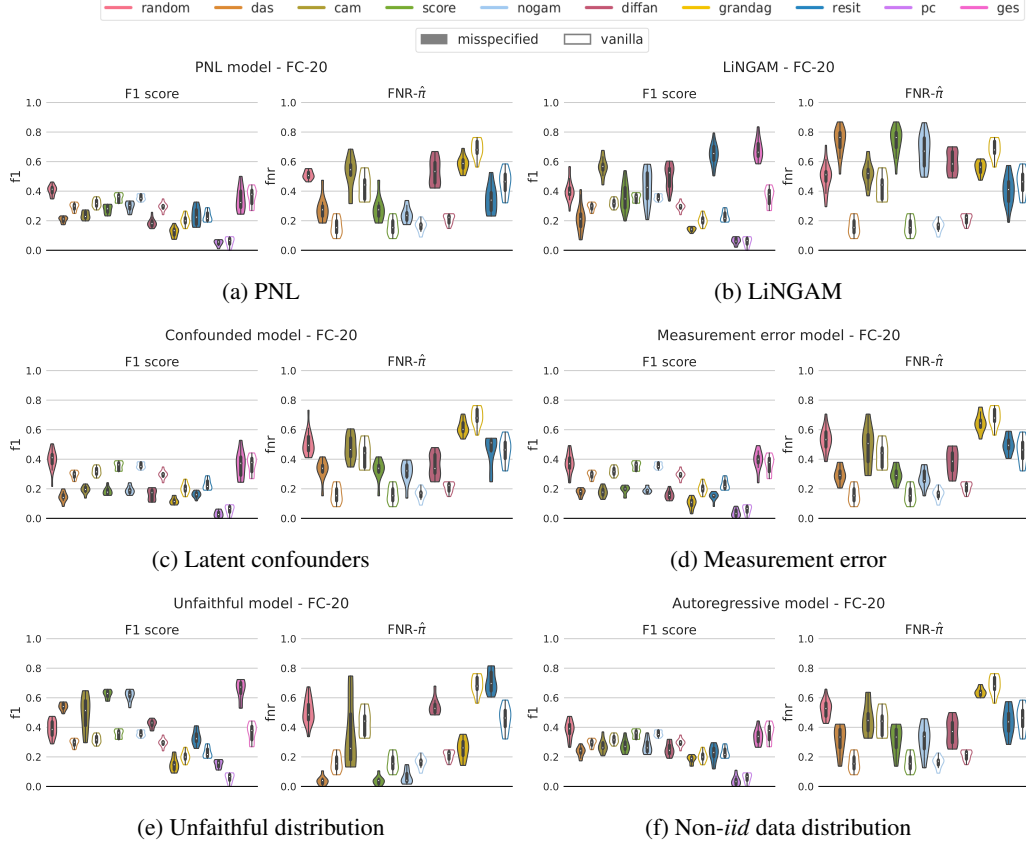

Figure 9: Experimental results on the misspecified scenarios. For each method, we also display the violin plot of its performance on the *vanilla* scenario with transparent color. F1 score (the higher the better) and  $\text{FNR}-\hat{\pi}$  (the lower the better) are evaluated over 20 seeds on fully connected graphs with 20 nodes (FC-20).  $\text{FNR}-\hat{\pi}$  is not computed for GES and PC methods, whose output is a CPDAG. Note that DirectLiNGAM performance does not appear, as both the linear mechanisms and non-Gaussian noise assumptions are violated.

974 probability 0.5, we expect a large number of false positives due to edges between nodes of different  
975 clusters.

976 **Implications.** Score matching-based approaches and CAM algorithm are remarkably robust to model  
977 misspecification both in terms of F1 score and  $\text{FNR}-\hat{\pi}$  accuracy.

## 978 K Other results

979 **Statistical efficiency.** Figure 11 shows F1 score and  $\text{FNR}-\hat{\pi}$  accuracy on datasets with sample size  
980 equals to 100 and 1000. Comparing the relative difference in performance with respect to different  
981 sample sizes, we get an empirical idea of the statistical efficiency of the inference methods. In line  
982 with our expectations, the experimental results show that both metrics are negatively affected by the  
983 reduction in sample size. Interestingly, in the case of SCORE, DAS, NoGAM, and DirectLiNGAM,  
984 we observe better stability of the  $\text{FNR}-\hat{\pi}$ , compared to the other methods, with the score matching-  
985 based approaches that are in general significantly better than the random baseline also with datasets  
986 of size 100.

987 **The effect of the graph size and density.** Figure 12 illustrates the F1 score and the  $\text{FNR}-\hat{\pi}$  accuracy  
988 on datasets generated according to the vanilla scenario and ground truth graphs that differ in size  
989 and density. In particular, we consider the case of dense and sparse graphs, with  $\{5, 10, 20, 50\}$   
990 nodes. Interestingly, we see good stability of the F1 score across different graph dimensions in  
991 the sparse case. The decrease in performance due to larger graph sizes is more evident in the case  
992 of dense graphs: this is particularly true for dense graphs with 50 nodes, where the preliminary  
993 neighbours search step (described in Section C.1) before the CAM-pruning reduces the ability to

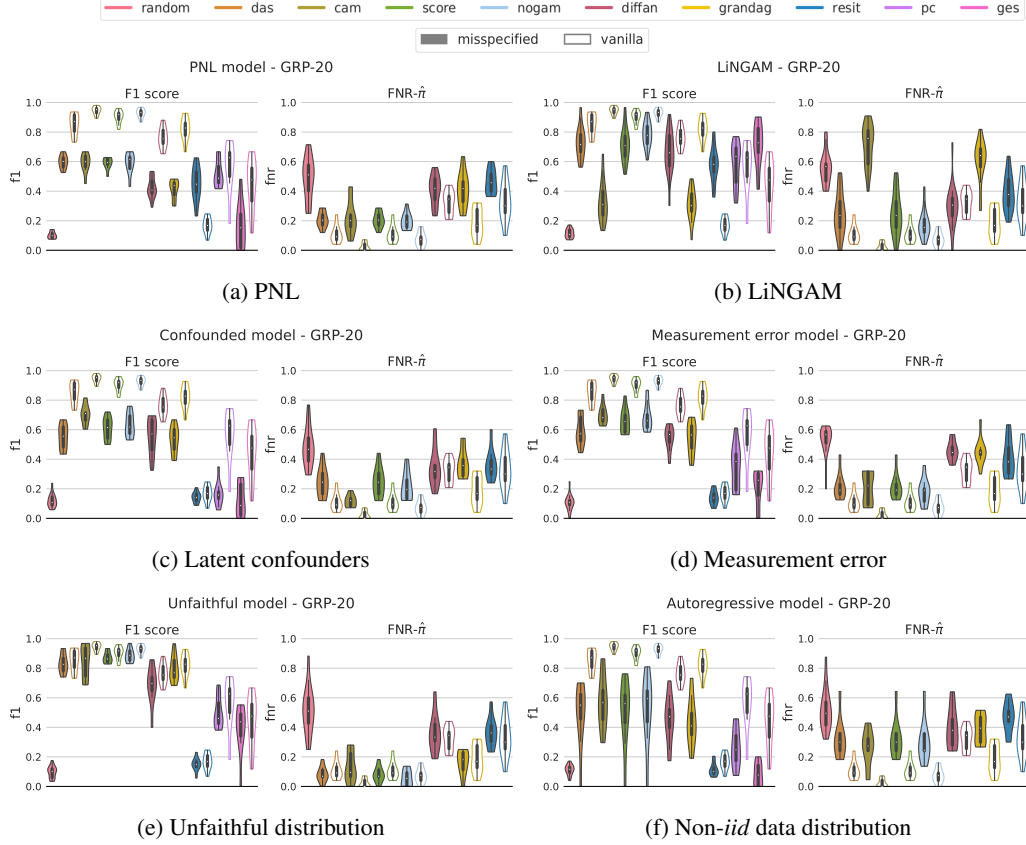

Figure 10: Experimental results on the misspecified scenarios. For each method, we also display the violin plot of its performance on the *vanilla* scenario with transparent color. F1 score (the higher the better) and FNR- $\hat{\pi}$  (the lower the better) are evaluated over 20 seeds on Gaussian Random Partitions graphs with 20 nodes (GRP-20). FNR- $\hat{\pi}$  is not computed for GES and PC methods, whose output is a CPDAG. Note that DirectLiNGAM performance does not appear, as both the linear mechanisms and non-Gaussian noise assumptions are violated.

infer true positives for most of the methods. Considering the FNR- $\hat{\pi}$  of the inferred orders, we see that, similarly to what we observed in the analysis of the F1 score, in the case of sparse ground truths most of the methods display stable results across different graph dimensions. Indeed, score matching-based approaches, as well as CAM, DiffAN, GraN-DAG, and DirectLiNGAM do not display any clear evidence of degraded performance for larger graphs. In the dense setting, instead, we see that CAM and DirectLiNGAM accuracy in the inference of the order is negatively affected by larger dimensionality.

## L FCI experiments on confounded graphs

In this section, we describe the experimental setting for the FCI algorithm (Fast Causal Inference) [4]. Given that the method can handle latent confounders, we focus our experiments on data generated from graphs admitting latent common causes.

**PAG.** The output graphical object of FCI is a Partial Ancestral Graph (PAG) [47]. It admits six types of edges. We denote the two ends of an edge as *marks*. The possible marks are a tail ( $-$ ), a circle ( $\circ$ ), and an arrowhead ( $>$ ), which combined allow for six edges. These graphs represent an equivalence class for *Maximal Ancestral Graphs*, which are graphical objects that represents the presence of confounders effects and selection bias [2].

**Metrics.** For the evaluation of the FCI inferred output, we adopt the strategy proposed by Heinze-Deml et al. [17] (see their Section 4.2). We define true positives, false positives, and false negatives over three possible adjacency matrices, each one defined by a specific query.

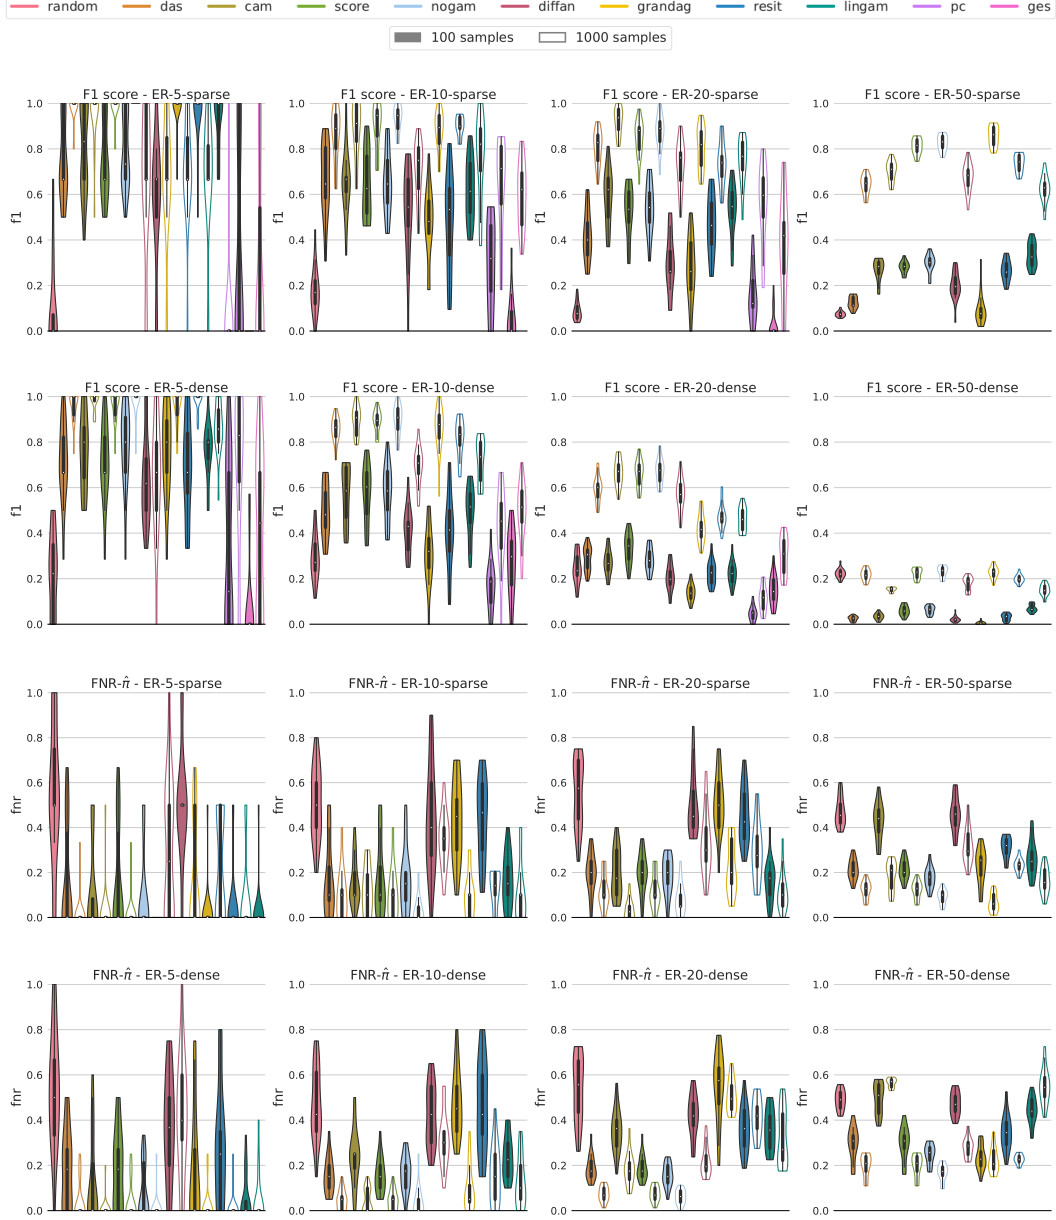

Figure 11: Experiments on the effect of the sample size. We compare the F1 score and  $\text{FNR}-\hat{\pi}$  accuracy on datasets generated under the vanilla scenario with Gaussian noise, with different sample sizes. We remark that in the case of DirectLiNGAM, in order to provide meaningful results, we report the performance on datasets with non-Gaussian noise terms. Violin plots filled with color refer to datasets of size 100, and transparent violin plots refer to datasets of size 1000. The metrics are reported on Erdos-Renyi graphs of size  $\{5, 10, 20, 50\}$  both in the sparse and dense case (PC and GES are not included for graphs of 50 nodes, as their computational demand is too high). Experiments are repeated over 20 different random seeds.

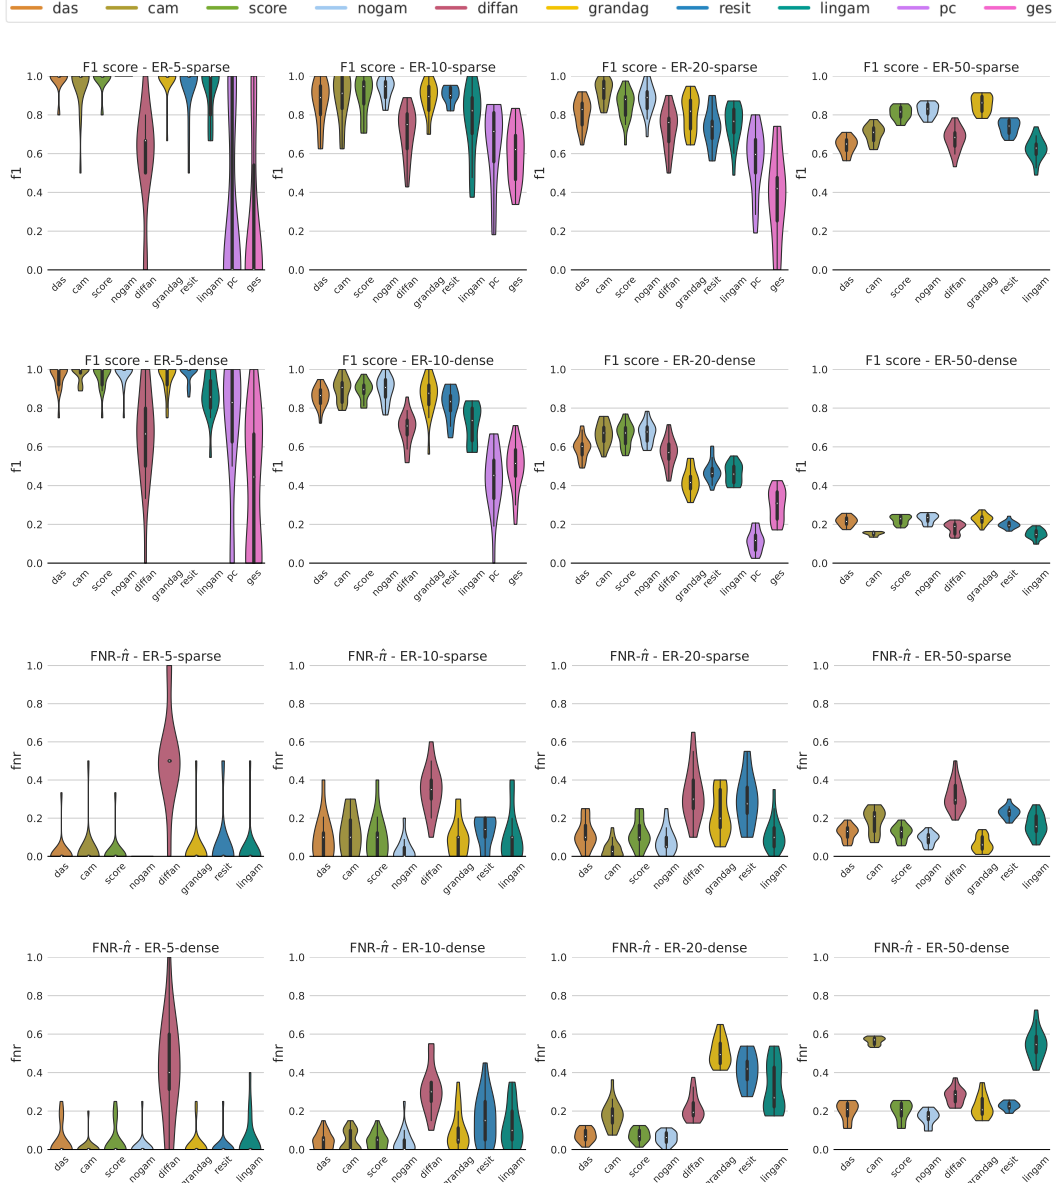

Figure 12: Experiments on the effect of the graph size and graph density. We compare the F1 score and  $\text{FNR}-\hat{\pi}$  accuracy on datasets generated under the vanilla scenario with Gaussian noise, on ground truth graphs with the number of nodes  $\{5, 10, 20, 50\}$  both in the sparse and dense case (PC and GES are not included for graphs of 50 nodes, as their computational demand is too high). We remark that in the case of DirectLiNGAM, in order to provide meaningful results, we report the performance on datasets with non-Gaussian noise terms. The metrics are reported on Erdos-Renyi graphs. Experiments are repeated over 20 different random seeds.

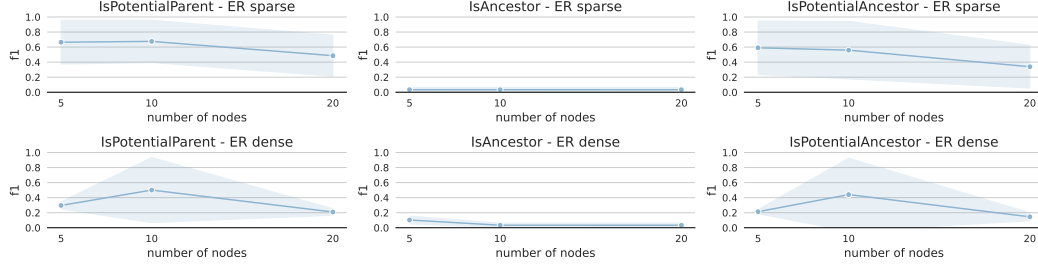

Figure 13: FCI performance on dense and sparse ER graphs, on datasets generated under latent confounders effects.

- 1013 • *IsPotentialParent* query: the estimated adjacency matrix has  $A_{ij} = 1$  if there is an edge  
1014 between  $X_i - X_j$ ,  $X_i \multimap X_j$ ,  $X_i \rightarrow X_j$ ,  $X_i \circ - X_j$ ,  $X_i \circ \circ X_j$ ,  $X_i \circ \rightarrow X_j$  in the estimated  
1015 PAG, else  $A_{ij} = 0$ .  $A_{ij} = 1$  denotes the case in which  $X_i$  is a potential parent of  $X_j$ .
- 1016 • *IsAncestor* query: the estimated adjacency matrix has  $A_{ij} = 1$  if there is a path from  $X_i$  to  
1017  $X_j$  with edges of type  $X_i \multimap X_j$ ,  $X_i \rightarrow X_j$ ,  $X_i \circ - X_j$  in the estimated PAG, else  $A_{ij} = 0$ .  
1018  $A_{ij} = 1$  denotes the case in which  $X_i$  is an ancestor of  $X_j$ .
- 1019 • *IsPotentialAncestor* query: the estimated adjacency matrix has  $A_{ij} = 1$  if there is a path  
1020 from  $X_i$  to  $X_j$  with edges of type  $X_i - X_j$ ,  $X_i \multimap X_j$ ,  $X_i \rightarrow X_j$ ,  $X_i \circ - X_j$ ,  $X_i \circ \circ X_j$ ,  
1021  $X_i \circ \rightarrow X_j$  in the estimated PAG, else  $A_{ij} = 0$ .  $A_{ij} = 1$  denotes the case in which  $X_i$  is a  
1022 potential ancestor of  $X_j$ .

1023 For each adjacency matrix defined by one of the three queries, we define true positives, false negatives,  
1024 and false positives as follows:

- 1025 • A true positive (TP) is a pair  $i, j$  with  $A_{ij} = 1$  in both the inferred and ground truth adjacency  
1026 matrices (with the ground truth DAG converted to a PAG).
- 1027 • A false negative (FN) is a pair  $i, j$  with  $A_{ij} = 0$  in the inferred matrix, and  $A_{ij} = 1$  in the  
1028 ground truth (with the ground truth DAG converted to a PAG).
- 1029 • A false positive (FP) is a pair  $i, j$  with  $A_{ij} = 1$  in the inferred matrix, and  $A_{ij} = 0$  in the  
1030 ground truth (with the ground truth DAG converted to a PAG).

1031 Given these definitions of TP, FN, FP, we define the F1 score as  $F1 = \frac{TP}{TP + 0.5(FP + FN)}$ , which we  
1032 use to present our empirical results in Figure 13.

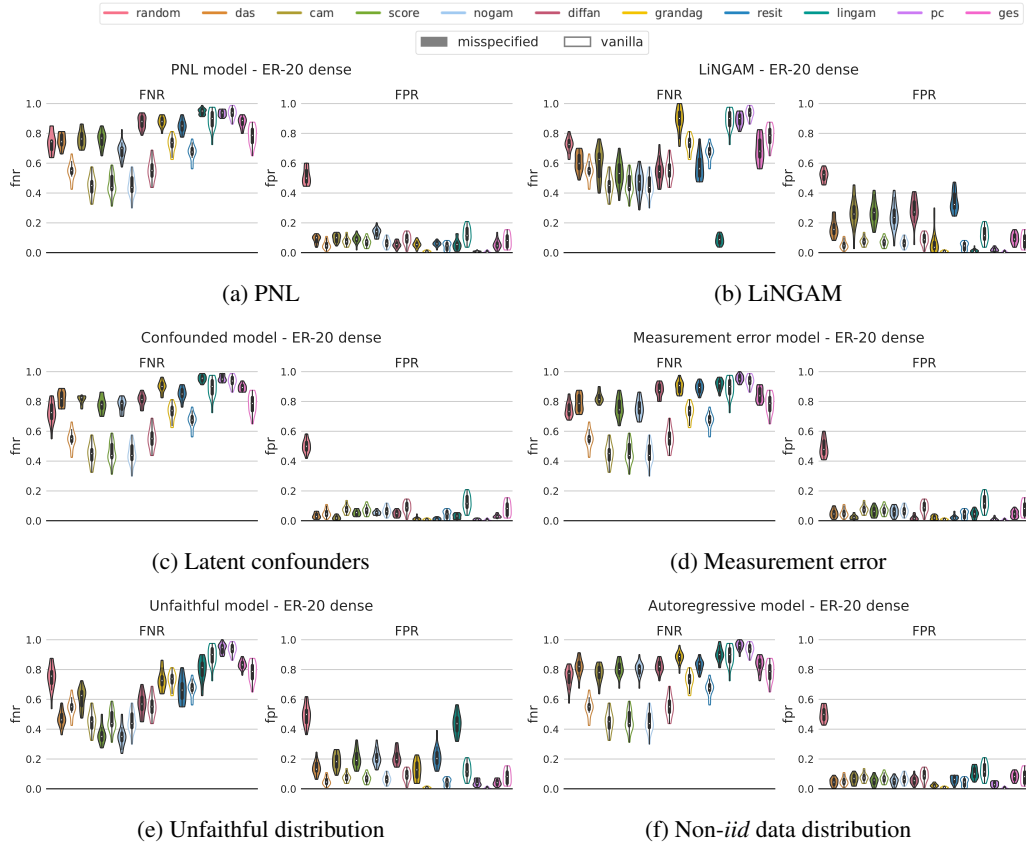

Figure 14: FNR (False Negative Rate) and FPR (False Positive Rate) of the experiments on the misspecified scenarios, on Erdos-Renyi dense graphs with 20 nodes (ER-20 dense). For each method, we also display the violin plot of its performance on the vanilla scenario with transparent color. The noise terms are normally distributed, except for the LiNGAM model, in which case we generate disturbances according to a non-Gaussian distribution.



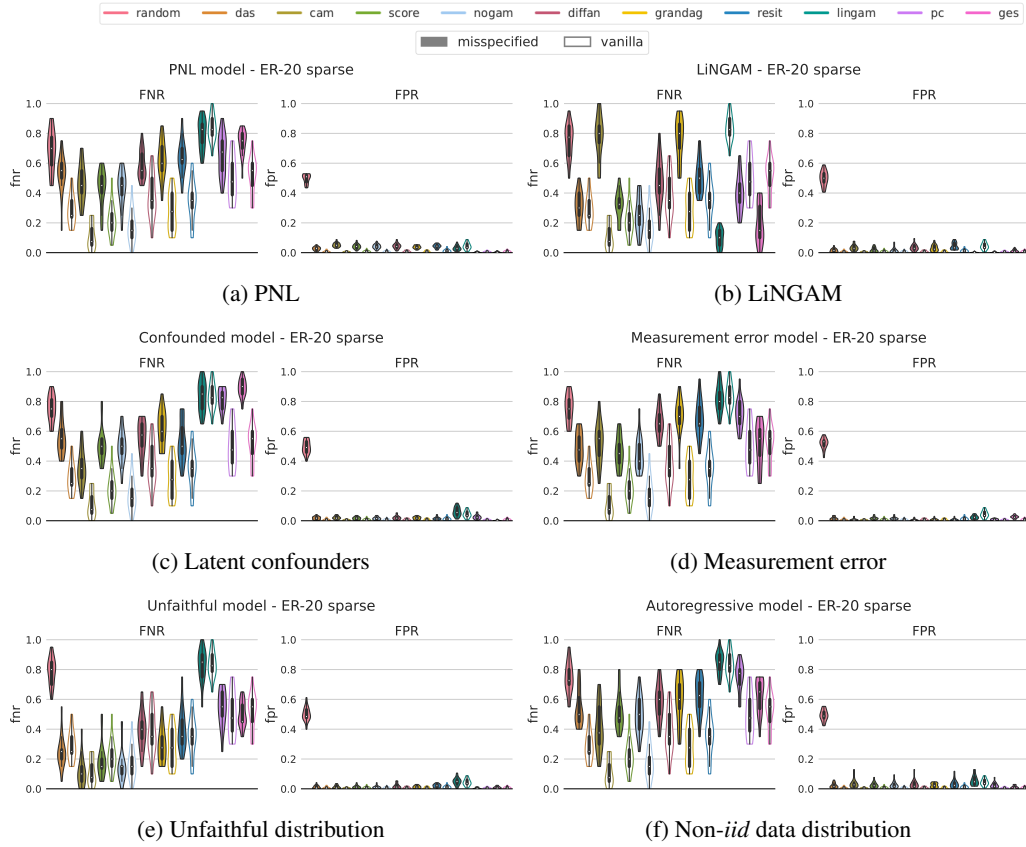

Figure 15: FNR (False Negative Rate) and FPR (False Positive Rate) of the experiments on the misspecified scenarios, on Erdos-Renyi sparse graphs with 20 nodes (ER-20 sparse). For each method, we also display the violin plot of its performance on the vanilla scenario with transparent color. The noise terms are normally distributed, except for the LiNGAM model, in which case we generate disturbances according to a non-Gaussian distribution.

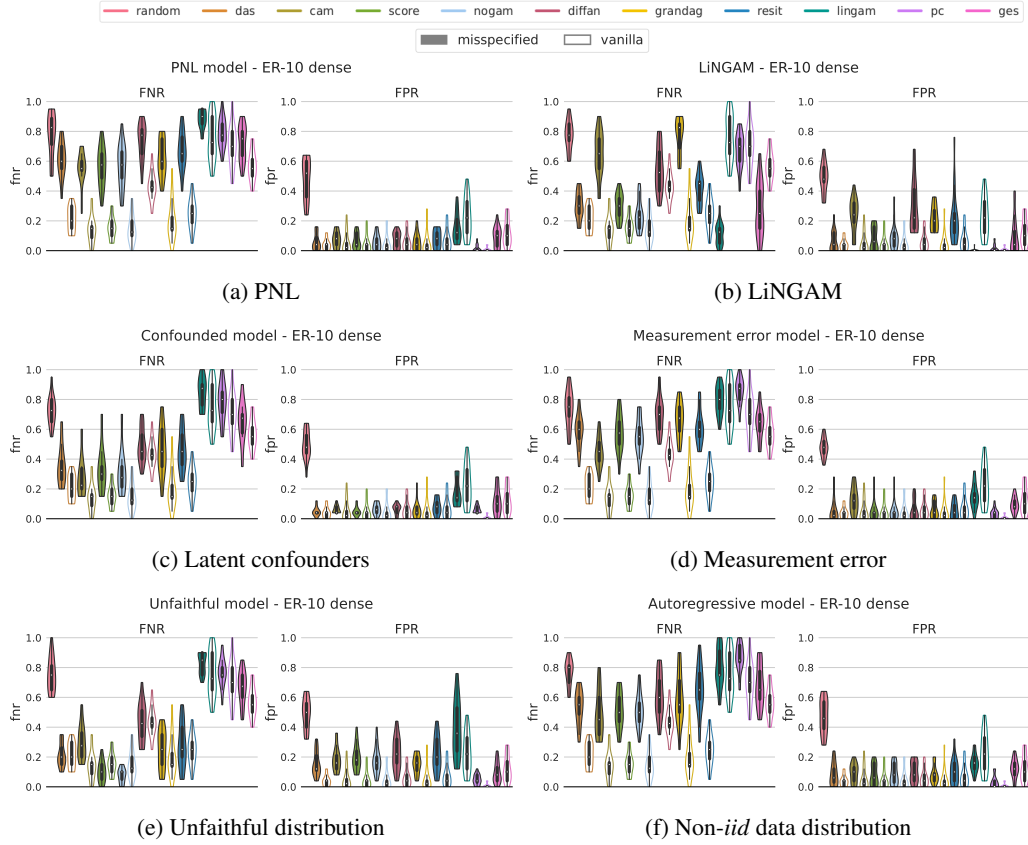

Figure 16: FNR (False Negative Rate) and FPR (False Positive Rate) of the experiments on the misspecified scenarios, on Erdos-Renyi dense graphs with 10 nodes (ER-10 dense). For each method, we also display the violin plot of its performance on the vanilla scenario with transparent color. The noise terms are normally distributed, except for the LiNGAM model, in which case we generate disturbances according to a non-Gaussian distribution.

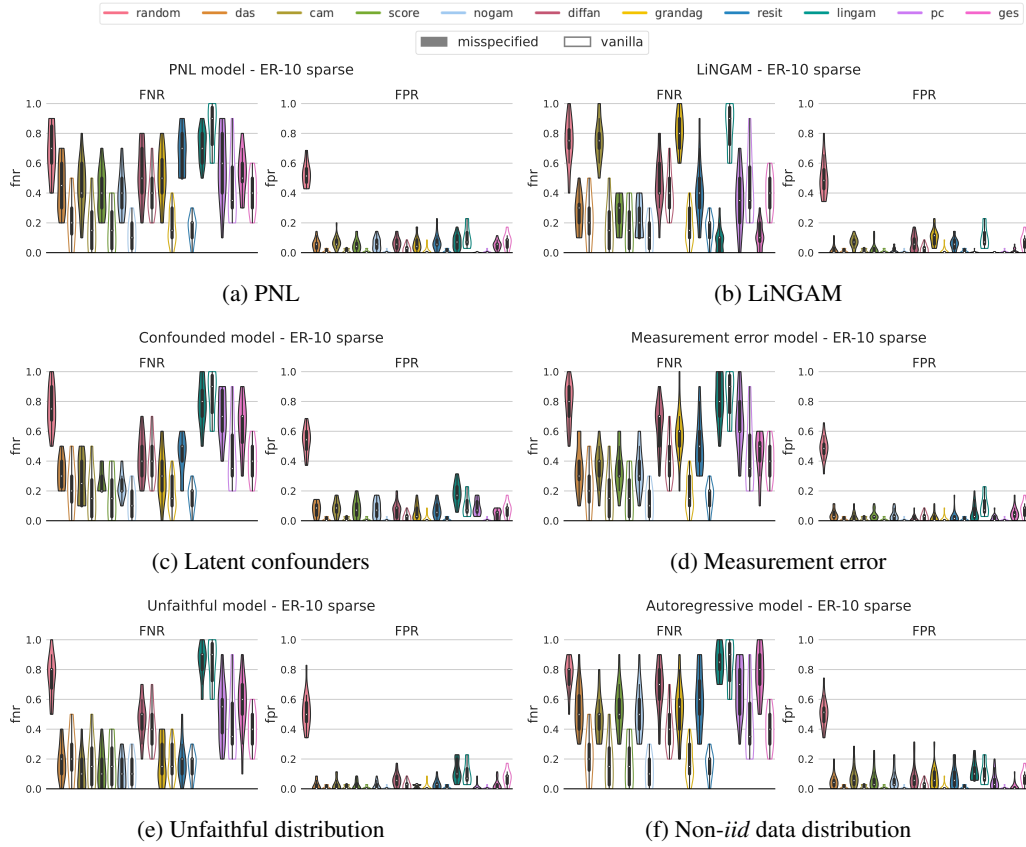

Figure 17: FNR (False Negative Rate) and FPR (False Positive Rate) of the experiments on the misspecified scenarios, on Erdos-Renyi sparse graphs with 10 nodes (ER-10 sparse). For each method, we also display the violin plot of its performance on the vanilla scenario with transparent color. The noise terms are normally distributed, except for the LiNGAM model, in which case we generate disturbances according to a non-Gaussian distribution.

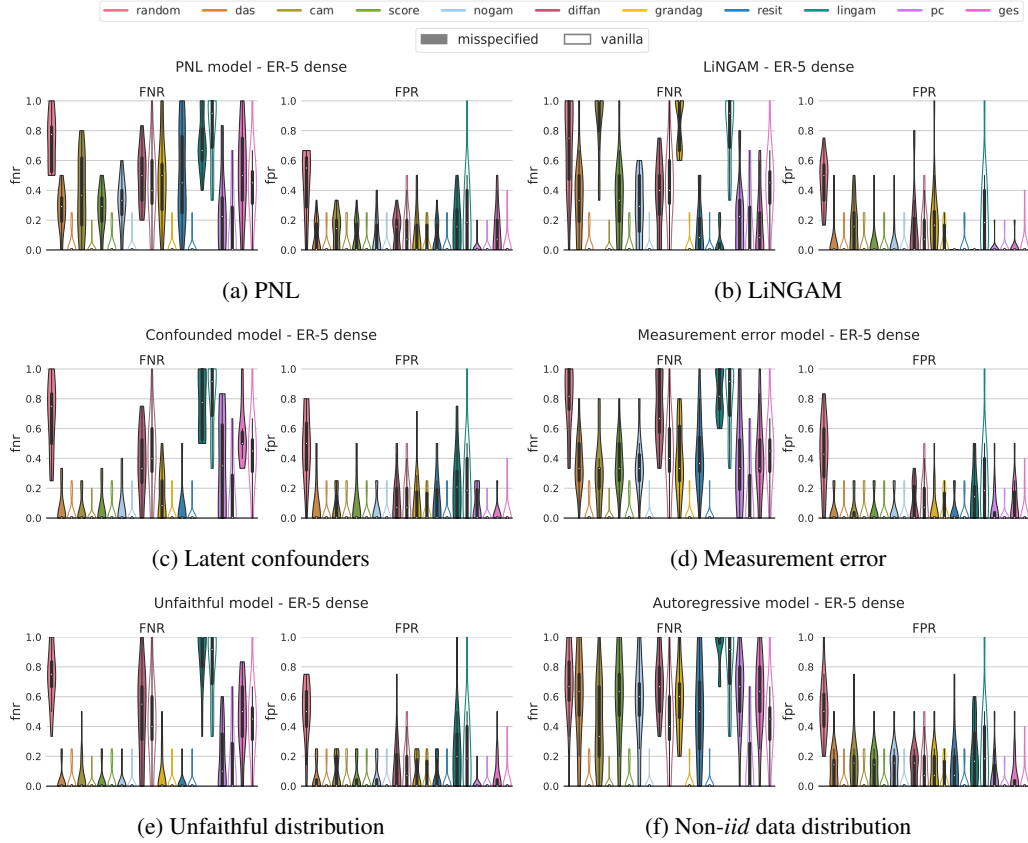

Figure 18: FNR (False Negative Rate) and FPR (False Positive Rate) of the experiments on the misspecified scenarios, on Erdos-Renyi dense graphs with 5 nodes (ER-5 dense). For each method, we also display the violin plot of its performance on the vanilla scenario with transparent color. The noise terms are normally distributed, except for the LiNGAM model, in which case we generate disturbances according to a non-Gaussian distribution.

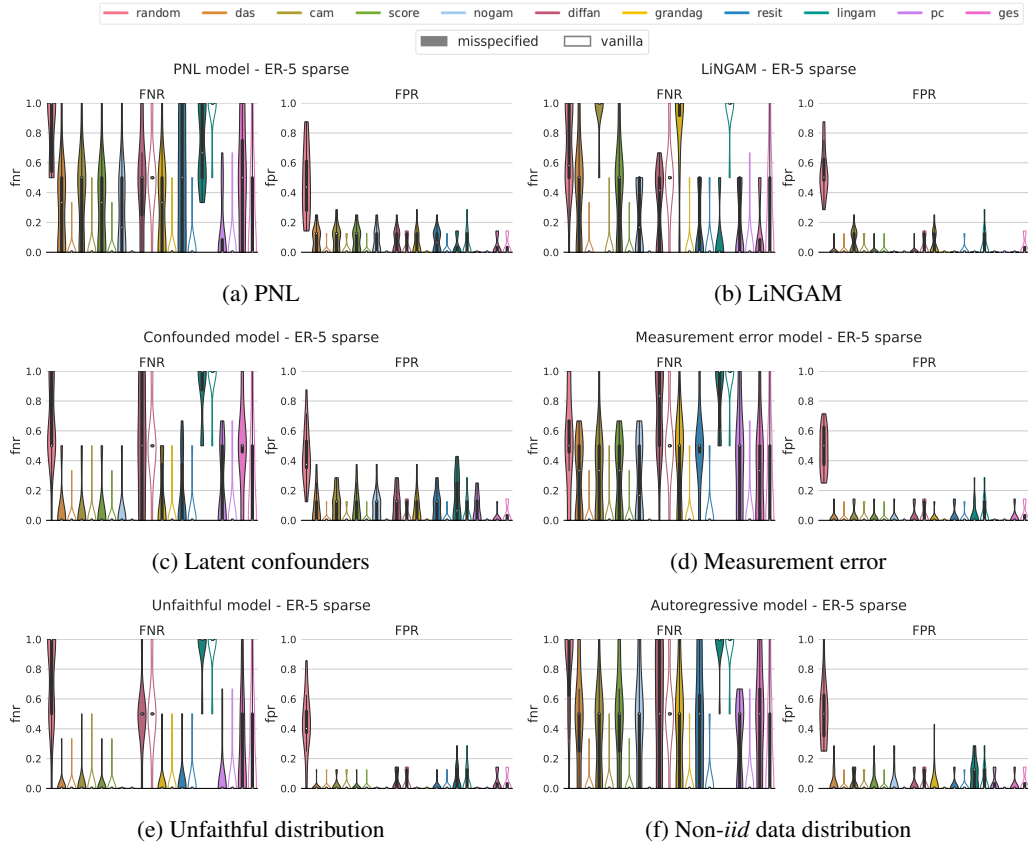

Figure 19: FNR (False Negative Rate) and FPR (False Positive Rate) of the experiments on the misspecified scenarios, on Erdos-Renyi sparse graphs with 5 nodes (ER-5 sparse). For each method, we also display the violin plot of its performance on the vanilla scenario with transparent color. The noise terms are normally distributed, except for the LiNGAM model, in which case we generate disturbances according to a non-Gaussian distribution.
